# Supplementary material
Source: publisher site journal article supplement (https://www.dovepress.com/article/540073)
Supplement: Supplementary file 1 [file Supplementary%20Information.doc]

**Table S1 PRISMA 2020 Checklist**

| **Section and Topic** | **Item #** | **Checklist item** | **Location where item is reported** |
| --- | --- | --- | --- |
| **TITLE** | | |  |
| Title | 1 | Identify the report as a systematic review. | Page 1 |
| **ABSTRACT** | | |  |
| Abstract | 2 | See the PRISMA 2020 for Abstracts checklist. | Page 2-3 |
| **INTRODUCTION** | | |  |
| Rationale | 3 | Describe the rationale for the review in the context of existing knowledge. | Page 4-6 |
| Objectives | 4 | Provide an explicit statement of the objective(s) or question(s) the review addresses. | Page 6 |
| **METHODS** | | |  |
| Eligibility criteria | 5 | Specify the inclusion and exclusion criteria for the review and how studies were grouped for the syntheses. | Page 7-8 |
| Information sources | 6 | Specify all databases, registers, websites, organizations, reference lists and other sources searched or consulted to identify studies. Specify the date when each source was last searched or consulted. | Page 7 |
| Search strategy | 7 | Present the full search strategies for all databases, registers and websites, including any filters and limits used. | Table S2 |
| Selection process | 8 | Specify the methods used to decide whether a study met the inclusion criteria of the review, including how many reviewers screened each record and each report retrieved, whether they worked independently, and if applicable, details of automation tools used in the process. | Page 10 |
| Data collection process | 9 | Specify the methods used to collect data from reports, including how many reviewers collected data from each report, whether they worked independently, any processes for obtaining or confirming data from study investigators, and if applicable, details of automation tools used in the process. | Page 10 |
| Data items | 10a | List and define all outcomes for which data were sought. Specify whether all results that were compatible with each outcome domain in each study were sought (e.g. for all measures, time points, analyses), and if not, the methods used to decide which results to collect. | Page 8-10 |
| 10b | List and define all other variables for which data were sought (e.g. participant and intervention characteristics, funding sources). Describe any assumptions made about any missing or unclear information. | Page 10 |
| Study risk of bias assessment | 11 | Specify the methods used to assess risk of bias in the included studies, including details of the tool(s) used, how many reviewers assessed each study and whether they worked independently, and if applicable, details of automation tools used in the process. | Page 10 |
| Effect measures | 12 | Specify for each outcome the effect measure(s) (e.g. risk ratio, mean difference) used in the synthesis or presentation of results. | Page 11-12 |
| Synthesis methods | 13a | Describe the processes used to decide which studies were eligible for each synthesis (e.g. tabulating the study intervention characteristics and comparing against the planned groups for each synthesis (item #5)). | Page 8-12 |
| 13b | Describe any methods required to prepare the data for presentation or synthesis, such as handling of missing summary statistics, or data conversions. | Page 8-9 |
| 13c | Describe any methods used to tabulate or visually display results of individual studies and syntheses. | Page 11-12 |
| 13d | Describe any methods used to synthesize results and provide a rationale for the choice(s). If meta-analysis was performed, describe the model(s), method(s) to identify the presence and extent of statistical heterogeneity, and software package(s) used. | Page 11-12 |
| 13e | Describe any methods used to explore possible causes of heterogeneity among study results (e.g. subgroup analysis, meta-regression). | Page 11-12 |
| 13f | Describe any sensitivity analyses conducted to assess robustness of the synthesized results. | Page 11 |
| Reporting bias assessment | 14 | Describe any methods used to assess risk of bias due to missing results in a synthesis (arising from reporting biases). | Page 10 |
| Certainty assessment | 15 | Describe any methods used to assess certainty (or confidence) in the body of evidence for an outcome. | Page 11 |
| **RESULTS** | | |  |
| Study selection | 16a | Describe the results of the search and selection process, from the number of records identified in the search to the number of studies included in the review, ideally using a flow diagram. | Page 12, Figure 1 |
| 16b | Cite studies that might appear to meet the inclusion criteria, but which were excluded, and explain why they were excluded. | NA |
| Study characteristics | 17 | Cite each included study and present its characteristics. | Page 12-13, Table 1, Table S3 |
| Risk of bias in studies | 18 | Present assessments of risk of bias for each included study. | Page 14, Figure 2-3 |
| Results of individual studies | 19 | For all outcomes, present, for each study: (a) summary statistics for each group (where appropriate) and (b) an effect estimate and its precision (e.g. confidence/credible interval), ideally using structured tables or plots. | Figure 4-6, 8 |
| Results of syntheses | 20a | For each synthesis, briefly summarise the characteristics and risk of bias among contributing studies. | NA |
| 20b | Present results of all statistical syntheses conducted. If meta-analysis was done, present for each the summary estimate and its precision (e.g. confidence/credible interval) and measures of statistical heterogeneity. If comparing groups, describe the direction of the effect. | Page 14-18 |
| 20c | Present results of all investigations of possible causes of heterogeneity among study results. | Page 16-17, Table S4, Figure.7 |
| 20d | Present results of all sensitivity analyses conducted to assess the robustness of the synthesized results. | Page 18, Figure 9-11 |
| Reporting biases | 21 | Present assessments of risk of bias due to missing results (arising from reporting biases) for each synthesis assessed. | Page 18-19, Figure 12 |
| Certainty of evidence | 22 | Present assessments of certainty (or confidence) in the body of evidence for each outcome assessed. | Table S5-S8 |
| **DISCUSSION** | | |  |
| Discussion | 23a | Provide a general interpretation of the results in the context of other evidence. | Page 19-21 |
| 23b | Discuss any limitations of the evidence included in the review. | Page 22 |
| 23c | Discuss any limitations of the review processes used. | Page 22 |
| 23d | Discuss implications of the results for practice, policy, and future research. | Page 22 |
| **OTHER INFORMATION** | | |  |
| Registration and protocol | 24a | Provide registration information for the review, including register name and registration number, or state that the review was not registered. | Page 6 |
| 24b | Indicate where the review protocol can be accessed, or state that a protocol was not prepared. | Page 6 |
| 24c | Describe and explain any amendments to information provided at registration or in the protocol. | NA |
| Support | 25 | Describe sources of financial or non-financial support for the review, and the role of the funders or sponsors in the review. | Page 23-24 |
| Competing interests | 26 | Declare any competing interests of review authors. | Page 24 |
| Availability of data, code and other materials | 27 | Report which of the following are publicly available and where they can be found: template data collection forms; data extracted from included studies; data used for all analyses; analytic code; any other materials used in the review. | Page 23 |

e.g.: exempli gratia; NA: not applicable.

**Table S2**. Search strategy

| **PubMed** | | **Records** |
| --- | --- | --- |
| #1 | (((((((((((((((((((Dysmenorrhea[MeSH Terms]) OR (primary dysmenorrhea[Title/Abstract])) OR (Painful menstruation[Title/Abstract])) OR (Dysmenorrhea[Title/Abstract])) OR (Menstruation, Painful[Title/Abstract])) OR (Menstruations, Painful[Title/Abstract])) OR (Painful Menstruation[Title/Abstract])) OR (Painful Menstruations[Title/Abstract])) OR (Pain, Menstrual[Title/Abstract])) OR (Menstrual Pain[Title/Abstract])) OR (Menstrual Pains[Title/Abstract])) OR (Pains, Menstrual[Title/Abstract])) OR (catamenial pain[Title/Abstract])) OR (menstrual period pain[Title/Abstract])) OR (menstruation pain[Title/Abstract])) OR (painful catamenia[Title/Abstract])) OR (painful menstrual period[Title/Abstract])) OR (primary dysmenorrhoea[Title/Abstract])) OR (dysmenorrhoea[Title/Abstract])) OR (Dysmenorrheas[Title/Abstract]) | 10008 |
| #2 | (((((((((((((Acupuncture[MeSH Terms]) OR (Acupuncture[Title/Abstract])) OR (Electroacupuncture[Title/Abstract])) OR (Electro-acupuncture[Title/Abstract])) OR (Electric Stimulation[Title/Abstract])) OR (Needle[Title/Abstract])) OR (Needling[Title/Abstract])) OR (Electric acupuncture[Title/Abstract])) OR (Trigger point[Title/Abstract])) OR (acupunct*[Title/Abstract])) OR (electroacupunct*[Title/Abstract])) OR (electro-acupunct*[Title/Abstract])) OR (acupoint[Title/Abstract])) OR (acupuncture point[Title/Abstract]) | 177481 |
| #3 | #1 AND #2 | **426** |
| **The Cochrane Library** | | **Records** |
| #1 | (acupuncture):ti,ab,kw OR (electro acupuncture):ti,ab,kw OR (electroacupuncture):ti,ab,kw OR (electric stimulation):ti,ab,kw OR (needle):ti,ab,kw | 58500 |
| #2 | MeSH descriptor: [Acupuncture] explode all trees | 225 |
| #3 | (needling):ti,ab,kw OR (electric acupuncture):ti,ab,kw OR (trigger point):ti,ab,kw OR (acupunct*):ti,ab,kw OR (electroacupunct*):ti,ab,kw | 25849 |
| #4 | (electro acupunct*):ti,ab,kw OR (acupuncture point):ti,ab,kw OR (acupoint):ti,ab,kw | 7665 |
| #5 | #1 OR #2 OR #3 OR #4 | 61069 |
| #6 | MeSH descriptor: [Dysmenorrhea] explode all trees | 973 |
| #7 | (dysmenorrhea):ti,ab,kw OR (primary dysmenorrhea):ti,ab,kw OR (menstruation, painful):ti,ab,kw OR (menstruations, painful):ti,ab,kw OR (painful menstruation):ti,ab,kw | 3383 |
| #8 | (painful menstruations):ti,ab,kw OR (pain, menstrual):ti,ab,kw OR (menstrual pains):ti,ab,kw OR (menstrual pain):ti,ab,kw OR (pains, menstrual):ti,ab,kw | 2871 |
| #9 | (catamenial pain):ti,ab,kw OR (dys menorrhea):ti,ab,kw OR (menstrual period pain):ti,ab,kw OR (dys menorrhoea):ti,ab,kw OR (menstruation pain):ti,ab,kw | 2010 |
| #10 | (dysmenorrheas):ti,ab,kw OR (dysmenorrhoea):ti,ab,kw OR (primary dysmenorrhoea):ti,ab,kw OR (painful menstrual period):ti,ab,kw OR (painful catamenia):ti,ab,kw | 3355 |
| #11 | #6 OR #7 OR #8 OR #9 OR #10 | 5196 |
| #12 | #5 AND #11 | **590** |
| **Embase** | | **Records** |
| #1 | 'dysmenorrhea'/exp OR 'primary dysmenorrhea':ab,ti OR dysmenorrhea:ab,ti OR 'menstruation, painful':ab,ti OR 'menstruations, painful':ab,ti OR 'painful menstruation':ab,ti OR 'painful menstruations':ab,ti OR 'pain, menstrual':ab,ti OR 'menstrual pains':ab,ti OR 'menstrual pain':ab,ti OR 'pains, menstrual':ab,ti OR 'catamenial pain':ab,ti OR 'dys menorrhea':ab,ti OR 'menstrual period pain':ab,ti OR 'dys menorrhoea':ab,ti OR 'menstruation pain':ab,ti OR 'painful catamenia':ab,ti OR 'painful menstrual period':ab,ti OR 'primary dysmenorrhoea':ab,ti OR dysmenorrhoea:ab,ti OR dysmenorrheas:ab,ti | 19934 |
| #2 | 'acupuncture'/exp OR acupuncture:ab,ti OR electroacupuncture:ab,ti OR 'electro acupuncture':ab,ti OR 'electric stimulation':ab,ti OR needle:ab,ti OR needling:ab,ti OR 'electric acupuncture':ab,ti OR 'trigger point':ab,ti OR acupunct*:ab,ti OR electroacupunct*:ab,ti OR 'electro acupunct*':ab,ti OR 'acupuncture point':ab,ti OR 'acupoint':ab,ti | 260229 |
| #3 | #1 AND #2 | **857** |
| **Web of science** | | **Records** |
| #1 | ((((((((((((((((((((TS=(primary dysmenorrhea)) OR TS=(Painful menstruation)) OR TS=(Dysmenorrhea)) OR TS=(Menstruation, Painful)) OR TS=(Menstruations, Painful)) OR TS=(Painful Menstruation)) OR TS=(Painful Menstruations)) OR TS=(Pain, Menstrual)) OR TS=(Menstrual Pain)) OR TS=(Menstrual Pains)) OR TS=(Pains, Menstrual)) OR TS=(catamenial pain)) OR TS=(dys-menorrhea)) OR TS=(dys-menorrhoea)) OR TS=(menstrual period pain)) OR TS=(menstruation pain)) OR TS=(painful catamenia)) OR TS=(painful menstrual period)) OR TS=(primary dysmenorrhoea)) OR TS=(dysmenorrhoea)) OR TS=(Dysmenorrheas) | 7545 |
| #2 | (((((((((((TS=(acupuncture)) OR TS=(electroacupuncture)) OR TS=(electro acupuncture)) OR TS=(electric stimulation)) OR TS=(needle)) OR TS=(needling)) OR TS=(electric acupuncture)) OR TS=(trigger point)) OR TS=(acupunct*)) OR TS=(electroacupunct*)) OR TS=(electro acupunct*)) OR TS=(acupoint) | 182563 |
| #3 | #1 AND #2 | **345** |
| **China National Knowledge Infrastructure (CNKI)** | | **Records** |
|  | (Topic: acupuncture + needle + electroacupuncture + dry acupuncture + auricular acupuncture + wrist ankle acupuncture + scalp acupuncture + abdominal acupuncture + acupoint) AND (Topic: dysmenorrhea + primary dysmenorrhea + menstrual abdominal pain) | **4126** |
| **China Biology Medicine disc (CBM)** | | **Records** |
|  | (((“acupuncture” OR “needle” OR “electroacupuncture” OR “dry acupuncture” OR “auricular acupuncture” OR “wrist ankle acupuncture” OR “scalp acupuncture” OR “abdominal acupuncture” OR “acupoint”) AND ("dysmenorrhea” OR “primary dysmenorrhea” OR “menstrual abdominal pain”)) | **4752** |
| **WanFang Database** | | **Records** |
|  | (Topic: acupuncture OR needle OR electroacupuncture OR dry acupuncture OR auricular acupuncture OR wrist ankle acupuncture OR scalp acupuncture OR abdominal acupuncture OR acupoint) AND (Topic: dysmenorrhea OR primary dysmenorrhea OR menstrual abdominal pain) | **3682** |
| **VIP Database** | | **Records** |
|  | (U= acupuncture OR needle OR electroacupuncture OR dry acupuncture OR auricular acupuncture OR wrist ankle acupuncture OR scalp acupuncture OR abdominal acupuncture OR acupoint) AND (U= dysmenorrhea OR primary dysmenorrhea OR menstrual abdominal pain) | **3752** |

#: serial number of search strategy; MeSH: medical Subject Headings; *: truncation symbol; ti: title; ab: abstract; kw: keywords; /exp: Emtree; TS: Topic Search; U: arbitrary field

**Table S3. Details of acupuncture treatment**

| **Study** | **Acupuncturist** | **Acupoints** | **Needle manipulation** | **Sessions** |
| --- | --- | --- | --- | --- |
| Liang 2018 | NI | CV12, CV10, CV6, CV4, ST24, ST3, and Xia Feng Shi point in all participants | No-De qi was achieved.  Insertion of the needles to the specified depth, without twisting or lifting. | Number of menstrual cycles treated: 3 cycles  Time per session: 20 min  Frequency of each menstrual cycle: once per day from 7 days before menstruation to the pain disappeared |
| Wei  2019 | NI | BL31, BL32, BL33, and BL34 in all participants | De qi was achieved.  Insertion of the needles inward and downward into BL31, BL32, and BL33 at angles of 15°, 30°, 45° respectively. Vertical insertion at BL33, with depth of 50-65mm until reaching posterior sacral foramen.  Needle manipulation twice. | Number of menstrual cycles treated: 3 cycles  Time per session: 30 min  Frequency of each menstrual cycle: once per day from the first day to the third day of menstruation |
| Liu  2021 | NI | ST36, SP8, SP6, RN12, CV4, ST29, LR3, PC6, and HT7 in all participants | De qi was achieved.  Use of sterile disposable needles (0.30 mm×40 mm or 0.30 mm×25 mm), depending on location.  Needle manipulation every 10 min. | Number of menstrual cycles treated: 3 cycles  Time per session: 30 min  Frequency of each menstrual cycle: three times before menstruation |
| Xu  2022 | NI | CV6, CV4, ST29, SP6, and BL23 in all participants | De qi was achieved；  Insertion of the needles inward and downward into acupoints at abdomen and waist. Vertical insertion into lower limb acupoints.  Needle manipulation every 15 min. | Number of menstrual cycles treated: 3 cycles  Time per session: 30 min  Frequency of each menstrual cycle: seven times before menstruation |
| Lu  2021 | NI | Auricular point: TF2, C018, TF4, C010, AH6, C012, and AT4 in all participants | Use of 0.2 mm×0.6 mm auricular intradermal needles.  Pressing of auricular intradermal needles three or four times every day, lasting three to four minutes per time. | Number of menstrual cycles treated: 3 cycles  Time per session: 1 day  Frequency of each menstrual cycle: four times before menstruation |
| Wang 2020 | Acupuncturist with standardized training | Dong's Qi acupoint | Use of left and right acupoints alternately, with simultaneous use prohibited. | Number of menstrual cycles treated: 3 cycles  Time per session: 30 min  Frequency of each menstrual cycle: once per day from 3 days before menstruation to the fifth day of menstruation |
| Huang 2023 | NI | EX-HN1, CV12, ST25, CV6, CV4, ST30, LI4, GB34, SP8, SP6, and LR3 in all participants | De qi was achieved；  Insertion of 0.25 mm×40 mm needles into all acupoints after ubsertubg heated fire needles No.3 into ES-HN1, CV12, ST25, CV6, and ST30. | Number of menstrual cycles treated: 3 cycles  Time per session: 30 min  Frequency of each menstrual cycle: seven times before menstruation |
| Cong 2011 | NI | SP6, BL32, SP8, and EX-B8 in all participants | De qi was achieved；  Needle manipulation every 10 min. | Number of menstrual cycles treated: 3 cycles  Time per session: 30 min  Frequency of each menstrual cycle: three times starting at the onset of pain |
| Cheng 2021 | NI | ST36, SP8, SP6, CV12, CV4, and ST29 | Needle manipulation 1 min after the achievement of De qi. | Number of menstrual cycles treated: 3 cycles  Time per session: 30 min  Frequency of each menstrual cycle: three times before menstruation |
| Sun 2021 | NI | Mandatory: CV4, SP6, and SP8 in all participants  Optional: individually selected points according to symptoms from LR3, SP10, ST29, ST36, CV6, and KI3 | De qi was achieved.  Insertion of needles to a depth of 15–30 mm, according to the location. | Number of menstrual cycles treated: 3 cycles  Time per session: 30 min  Frequency of each menstrual cycle: twice every week |
| Xu  2014 | NI | CV7, CV4, CV3, KI12, BL32, and SP6 in all participants | Vertical insertion of disposable acupuncture needles (0.25mm×30~40mm) at the depth of needles until the experience of pain, torpor or swelling around the point in the patient. | Number of menstrual cycles treated: 3 cycles  Time per session: 30 min  Frequency of each menstrual cycle: seven times before menstruation |
| Su  2022 | NI | S" ring acupuncture of Zhuang medicine | Insertion of needles based on "S" ring acupuncture of Zhuang medicine. | Number of menstrual cycles treated: 3 cycles  Time per session: 30 min  Frequency of each menstrual cycle: once every three days besides menstruation |
| Yang 2024 | Same doctor | Acupoints selected according to syndrome types of TCM. | Insertion of the needle, with proper adjustment according to the patient’s complaint, without lifting-thrusting or twirling reinforcing-reducing method. | Number of menstrual cycles treated: 3 cycles  Time per session: 30 min  Frequency of each menstrual cycle: once a week |
| Smith 2011 | Three acupuncturists registered with the Australian Acupuncture and Chinese Medicine Association | Mandatory: CV4, SP6, and SP8 in all participants  Optional: individually selected points according to symptoms. | De qi was achieved.  Insertion of needles to a depth of 15–30 mm, according to the location. | Number of menstrual cycles treated: 3 cycles  Time per session: 30 min  Frequency of each menstrual cycle: weekly for 3 weeks, followed by a week of no treatment during the week of expected menses |

NI: no information; min: minutes

**Table S4** Meta-regression of acupuncture versus NSAIDs

| **Covariate** | **tau2** | **I2** | **H2** | **R2** | **estimate** | **P** | **95 %CI** |
| --- | --- | --- | --- | --- | --- | --- | --- |
| Year | 150.037 | 95.13% | 20.55 | 0.00% | 2.119 | 0.412 | -2.94~7.18 |
| Age | 116.622 | 94.10% | 16.96 | 18.63% | -9.133 | 0.090 | -19.71~1.44 |
| Course of disease | 101.328 | 92.69% | 13.69 | 24.40% | 3.97 | 0.078 | -8.39 ~ 0.44 |


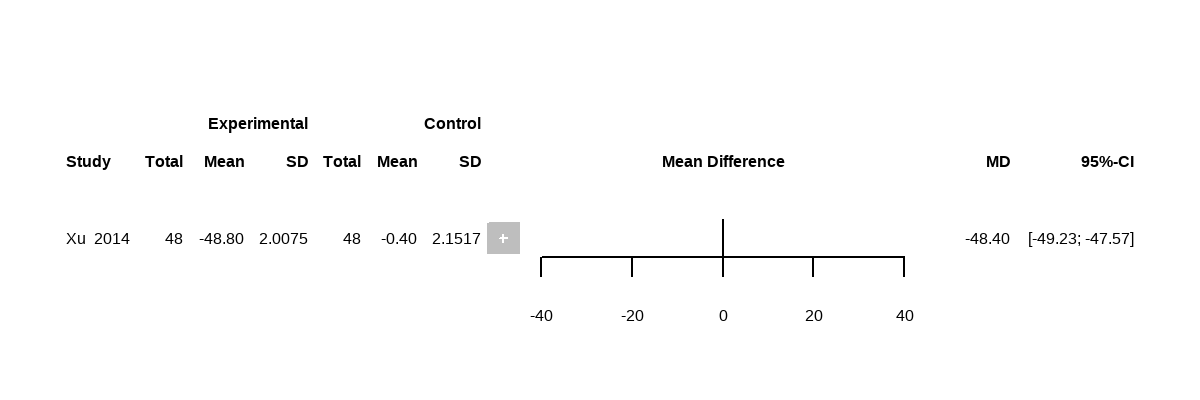


**Figure S1 The change of VAS from baseline to the end of treatment between acupuncture and no treatment**


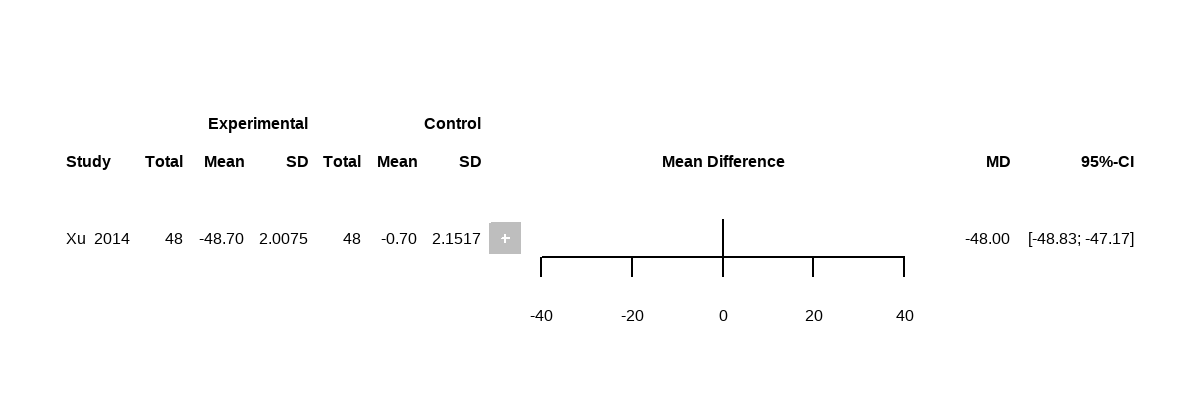


**Figure S2 The change of VAS from baseline to 1 menstrual cycle post-treatment between acupuncture and no treatment**


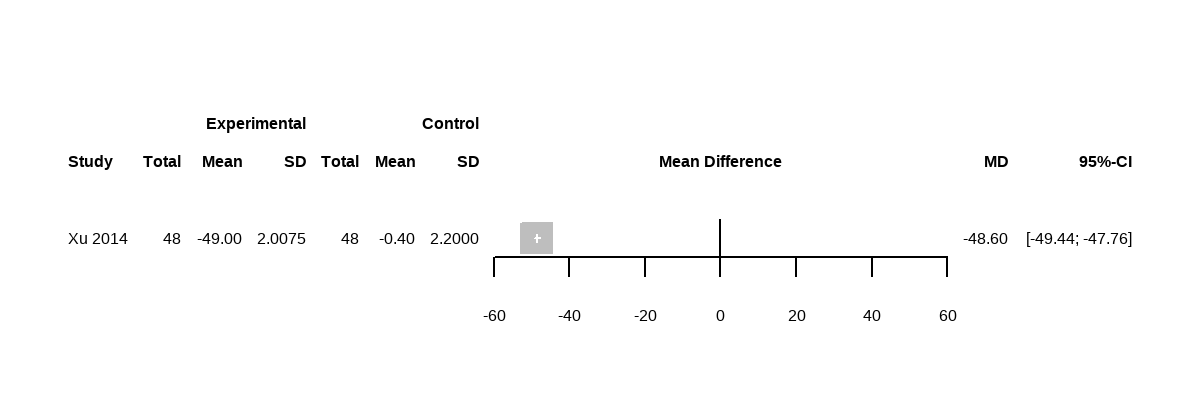


**Figure S3 The change of VAS from baseline to 2 menstrual cycles post-treatment between acupuncture and no treatment**


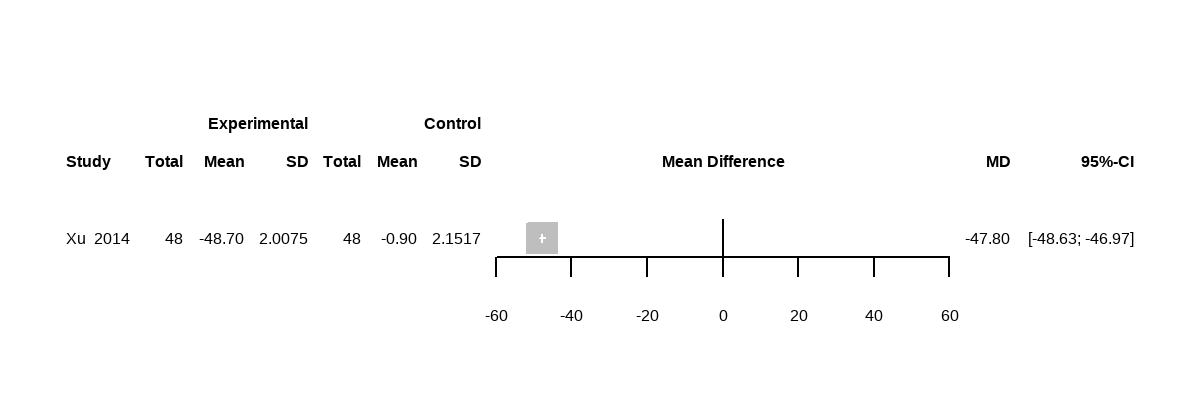


**Figure S4 The change of VAS from baseline to 3 menstrual cycles post-treatment between acupuncture and no treatment**


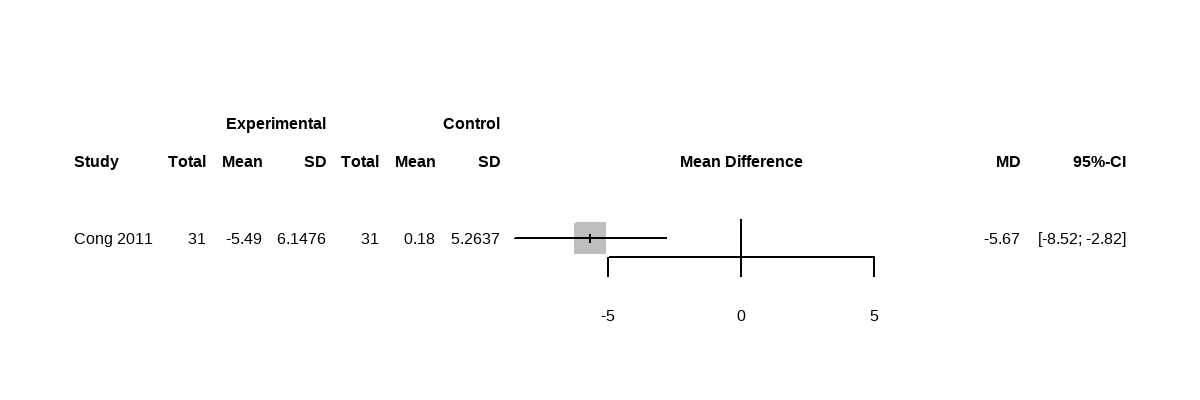


**Figure S5 The change of SF-MPQ from baseline to the end of treatment between acupuncture and no treatment**


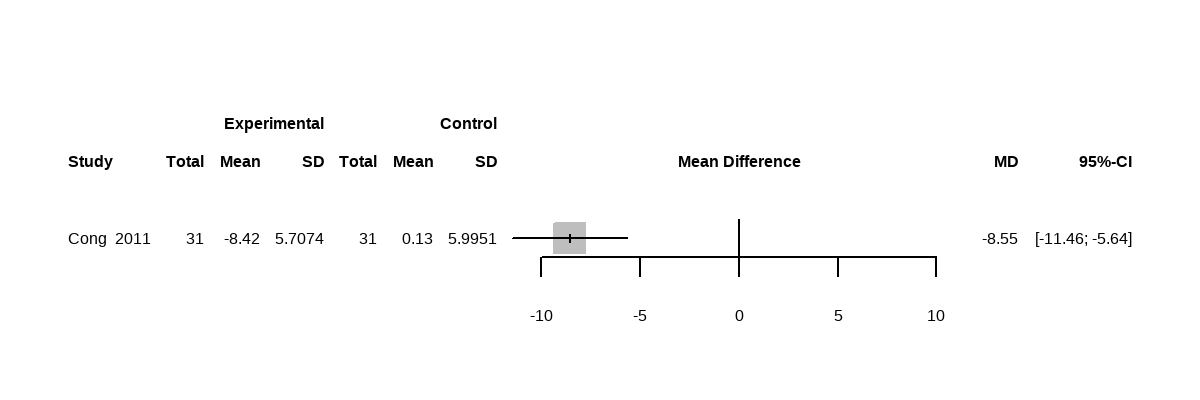


**Figure S6 The change of SF-MPQ from baseline to 3 menstrual cycles post-treatment between acupuncture and no treatment**


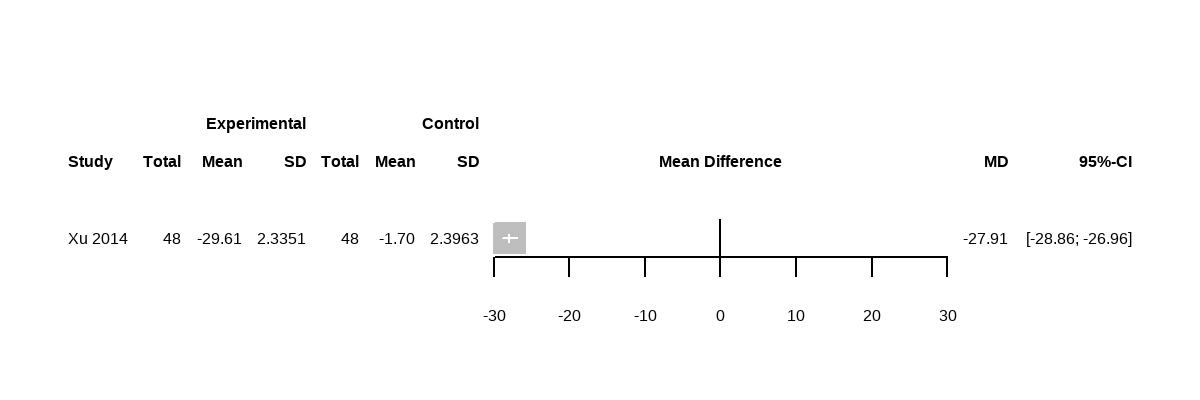


**Figure S7 The change of pain duration from baseline to the end of treatment between acupuncture and no treatment**


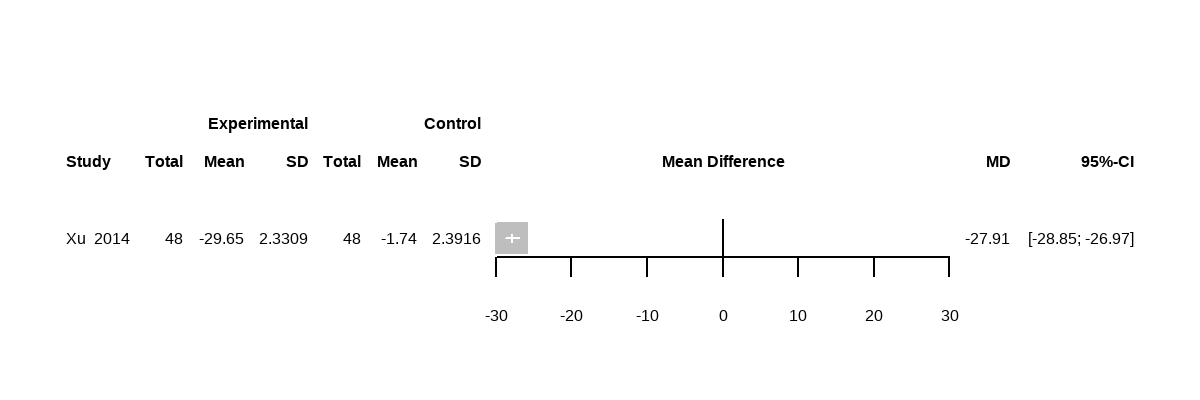


**Figure S8 The change of pain duration from baseline to 1 menstrual cycle post-treatment between acupuncture and no treatment**


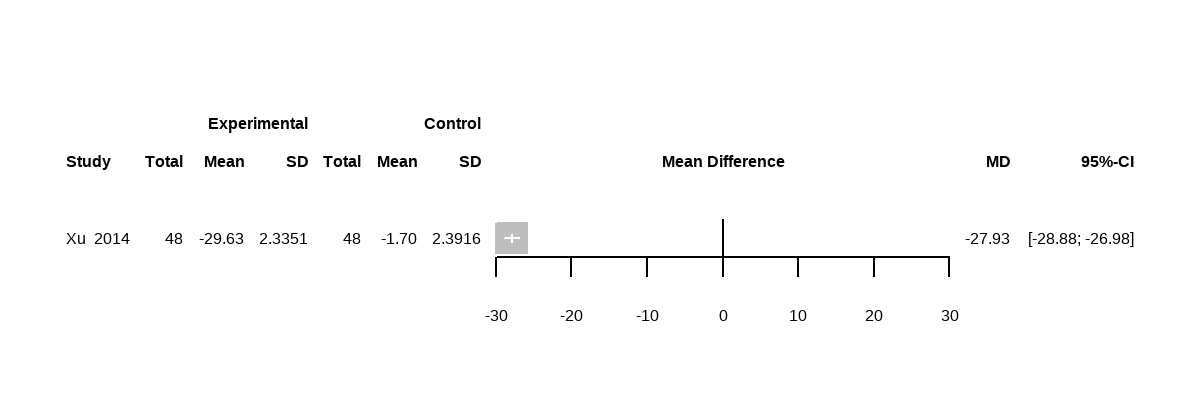


**Figure S9 The change of pain duration from baseline to 2 menstrual cycles post-treatment between acupuncture and no treatment**


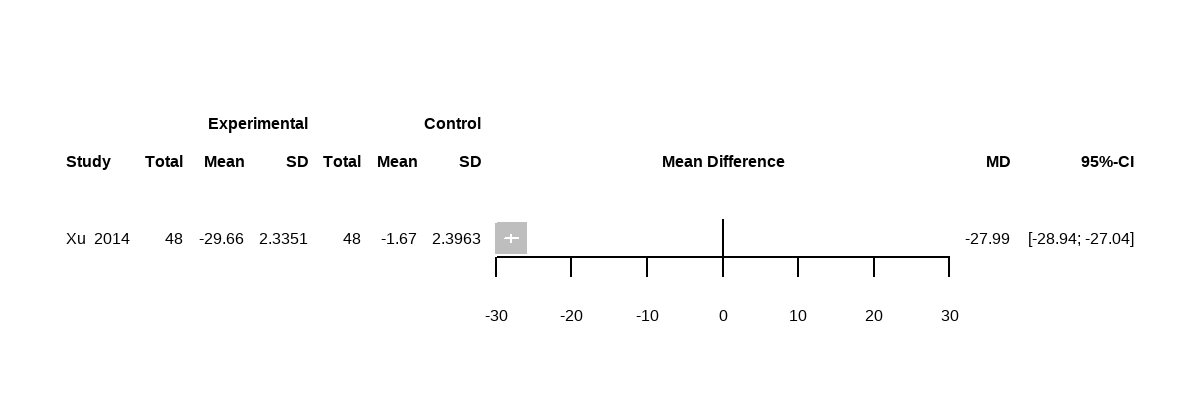


**Figure S10 The change of pain duration from baseline to 3 menstrual cycles post-treatment between acupuncture and no treatment**


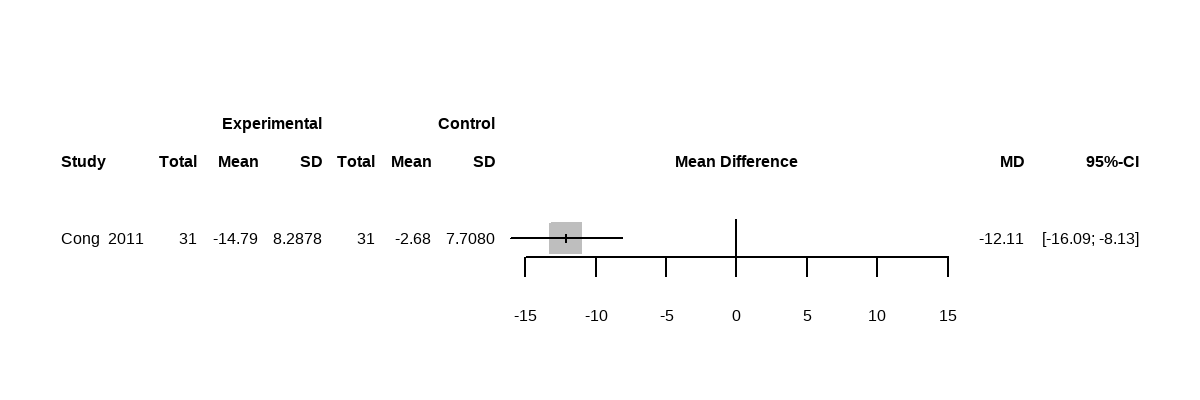


**Figure S11 The change of CMSS duration from baseline to the end of treatment between acupuncture versus and treatment**


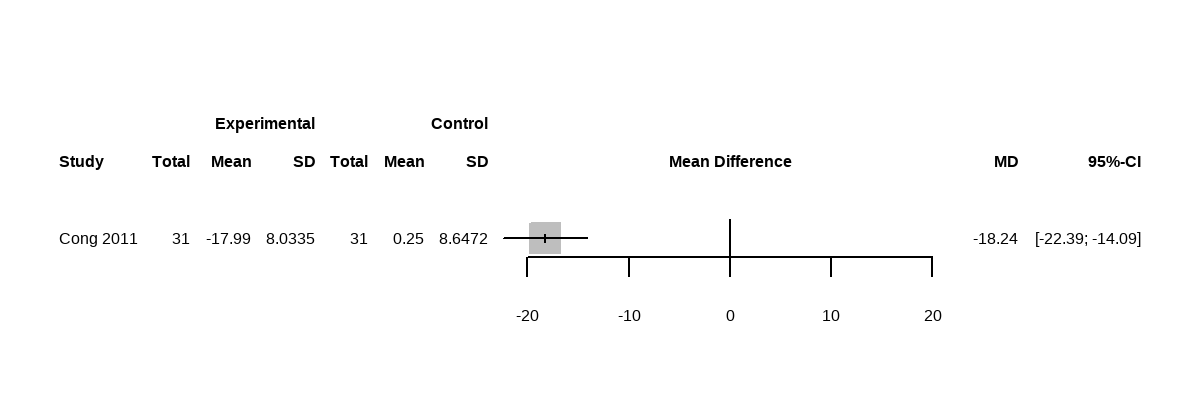


**Figure S12 The change of CMSS duration from baseline to 3 menstrual cycles post-treatment between acupuncture versus no treatment**


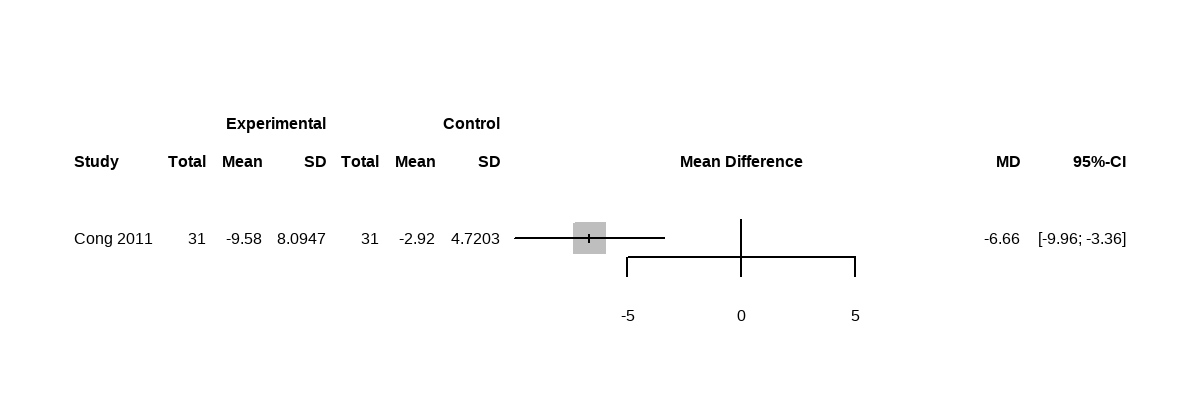


**Figure S13 The change of CMSS severity from baseline to the end of treatment between acupuncture and no treatment**


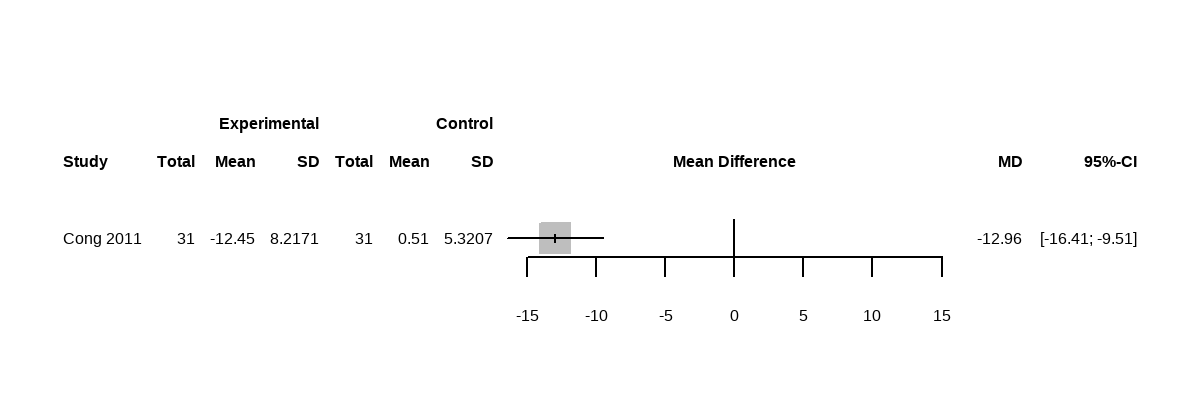


**Figure S14 The change of CMSS severity from baseline to 3 menstrual cycles post-treatment between acupuncture and no treatment**


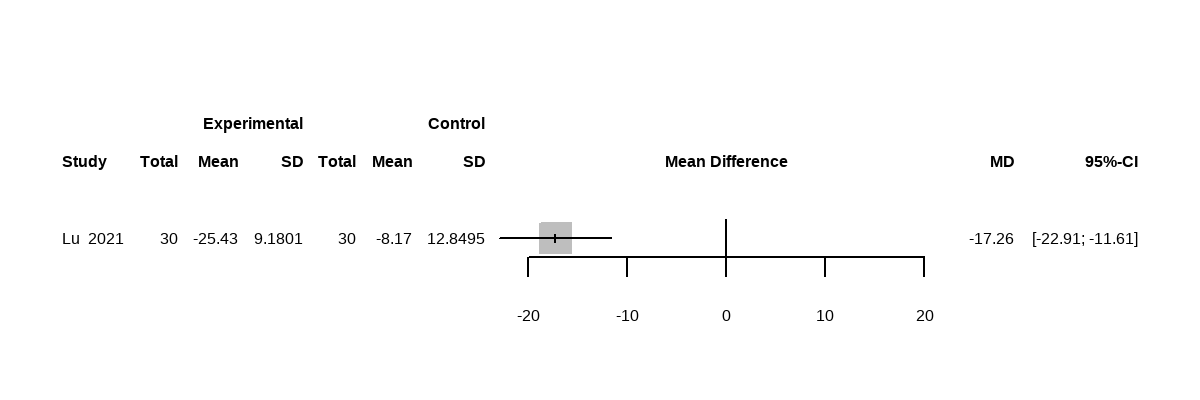


**Figure S15 The change of VAS from baseline to the end of treatment between acupuncture and SA**


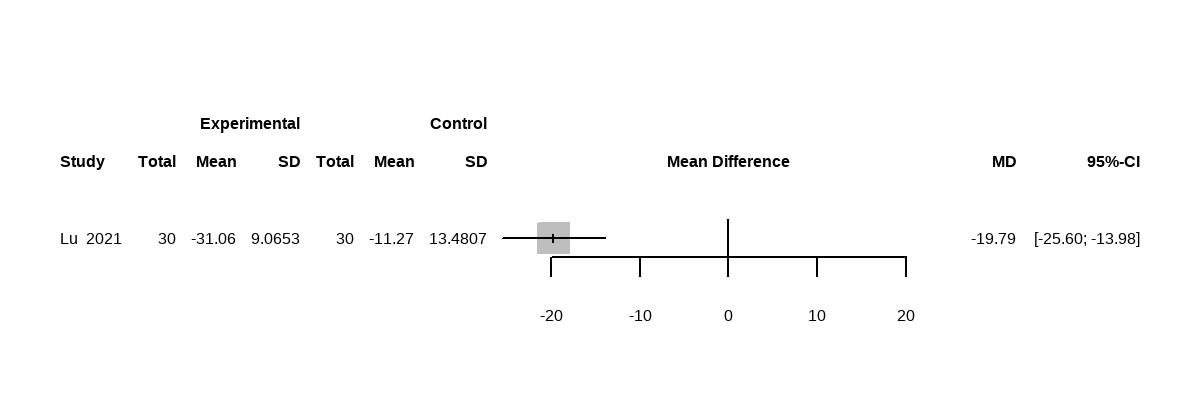


**Figure S16 The change of VAS from baseline to 1 menstrual cycle post-treatment between acupuncture and SA**


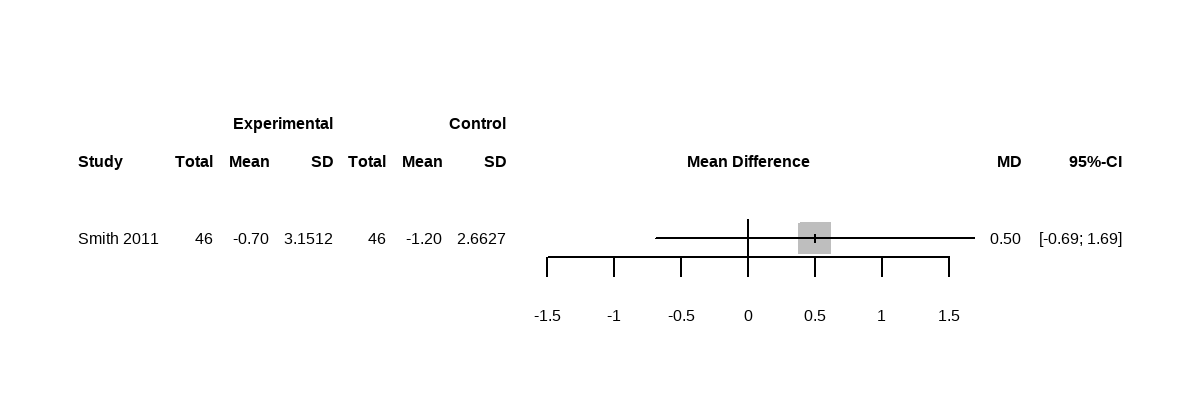


**Figure S17 The change of MPQ from baseline to the end of treatment between acupuncture and SA**


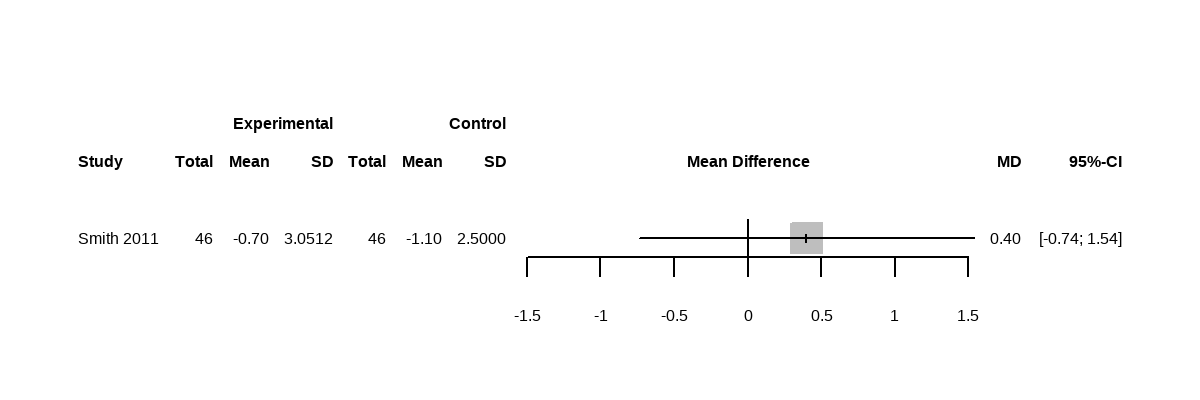


**Figure S18 The change of MPQ from baseline to 3 menstrual cycles post-treatment between acupuncture and SA**


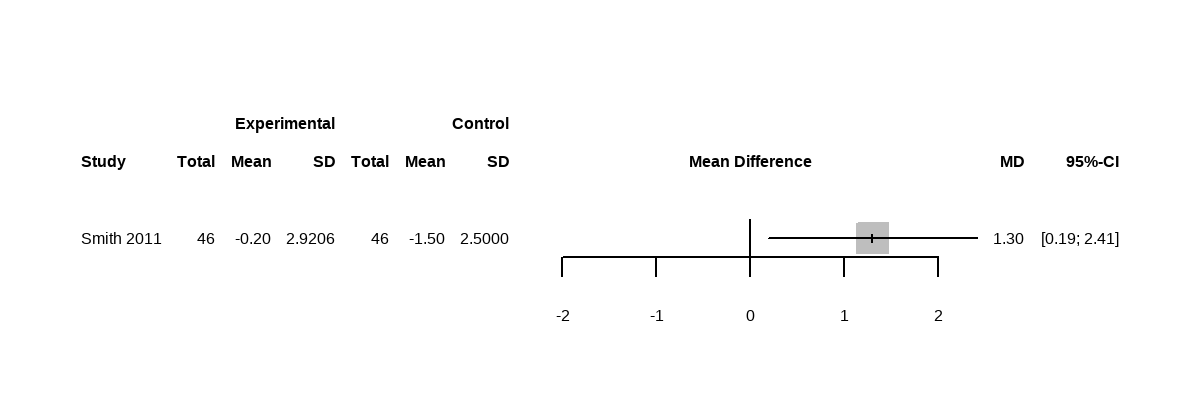


**Figure S19 The change of MPQ from baseline to 9 menstrual cycles post-treatment between acupuncture and SA**


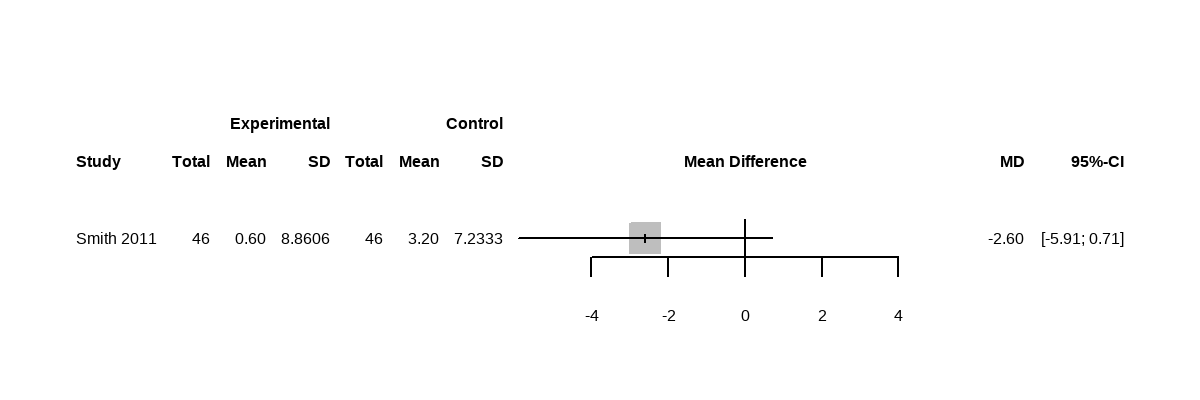


**Figure S20 The change of SF-36 physical component from baseline to the end of treatment between acupuncture and SA**


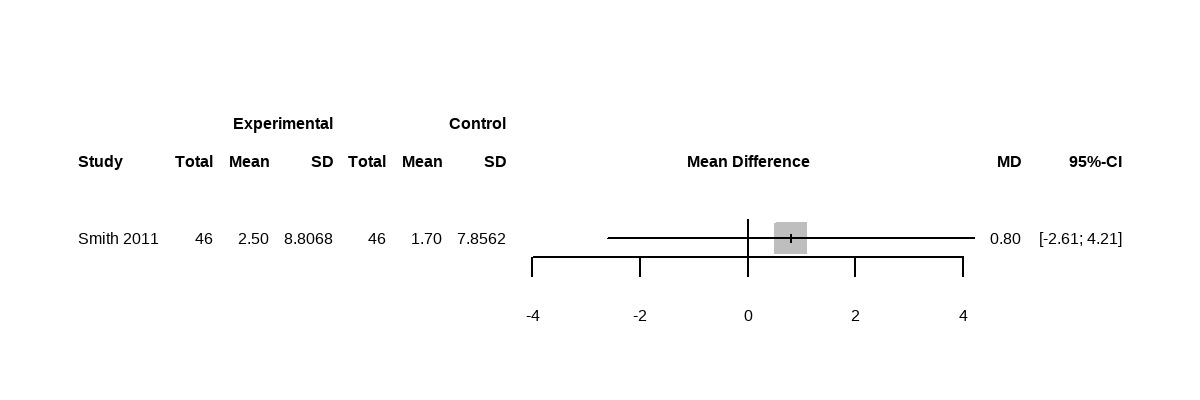


**Figure S21 The change of SF-36 physical component from baseline to 3 menstrual cycles post-treatment between acupuncture and SA**


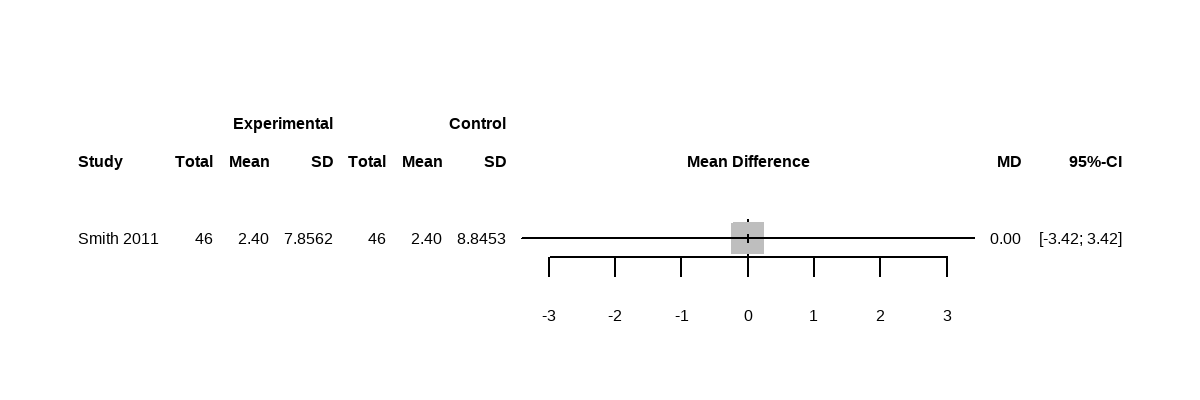


**Figure S22 The change of SF-36 physical component from baseline to 9 menstrual cycles post-treatment between acupuncture and SA**


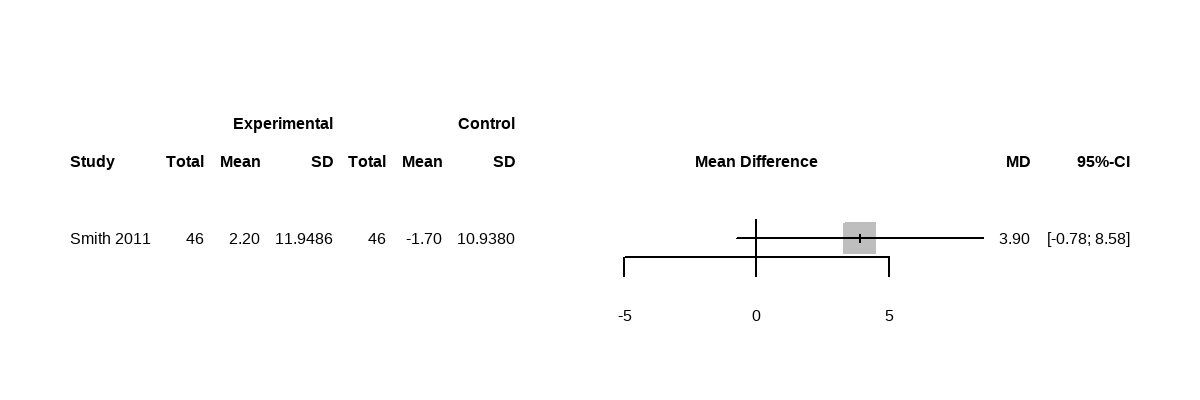


**Figure S23 The change of SF-36 mental component from baseline to the end of treatment between acupuncture and SA**


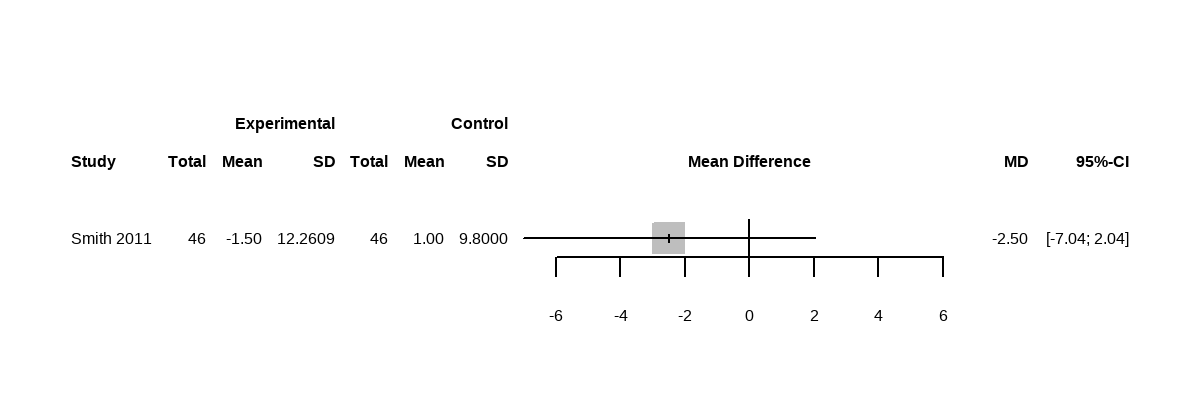


**Figure S24 The change of SF-36 mental component from baseline to 3 menstrual cycles post-treatment between acupuncture and SA**


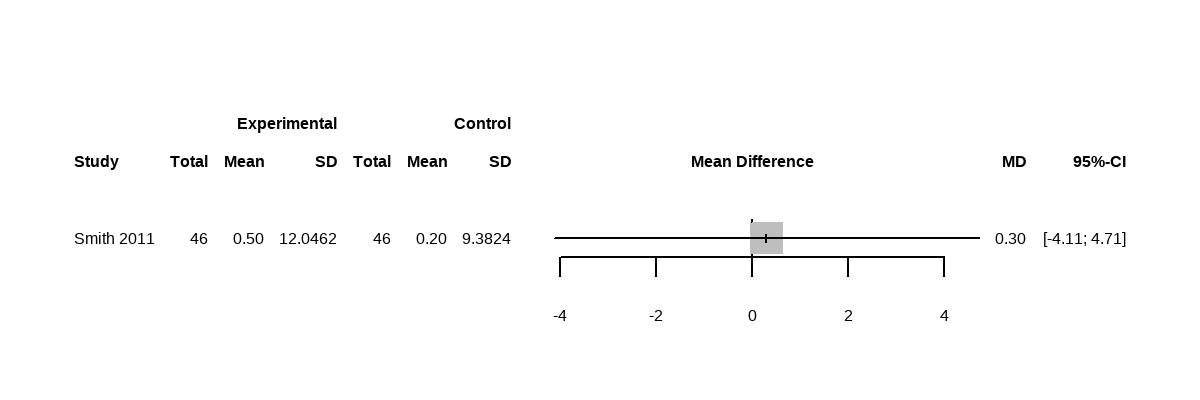


**Figure S25 The change of SF-36 mental component from baseline to 9 menstrual cycles post-treatment between acupuncture and SA**


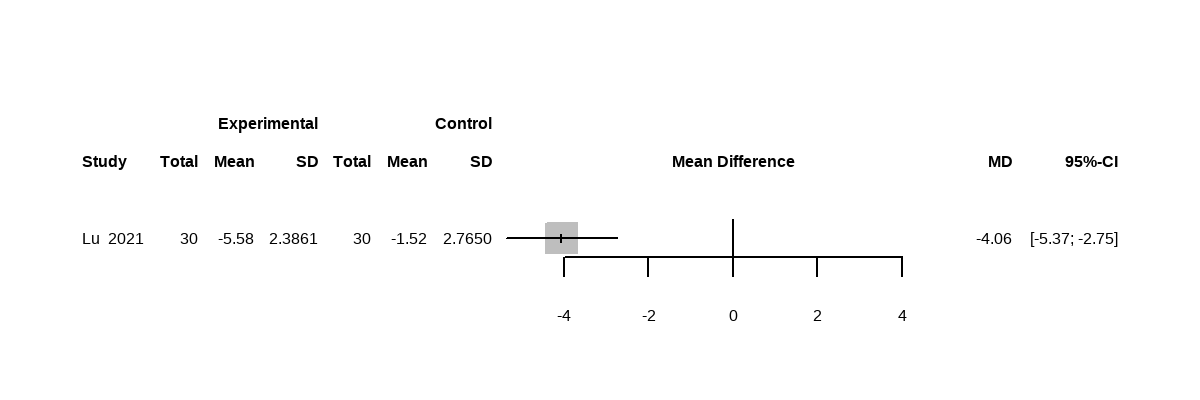


**Figure S26 The change of CMSS from baseline to the end of treatment between acupuncture and SA**


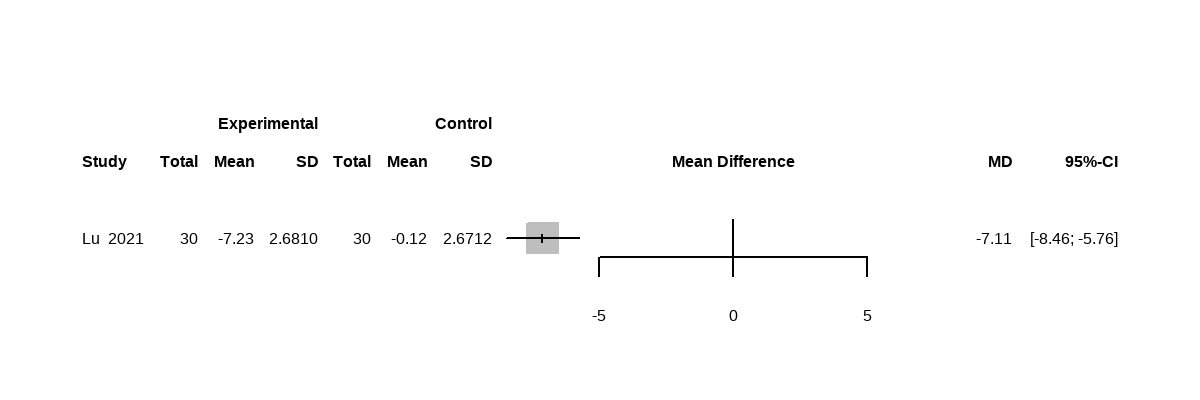


**Figure S27 The change of CMSS from baseline to 1 menstrual cycle post-treatment between acupuncture and SA**


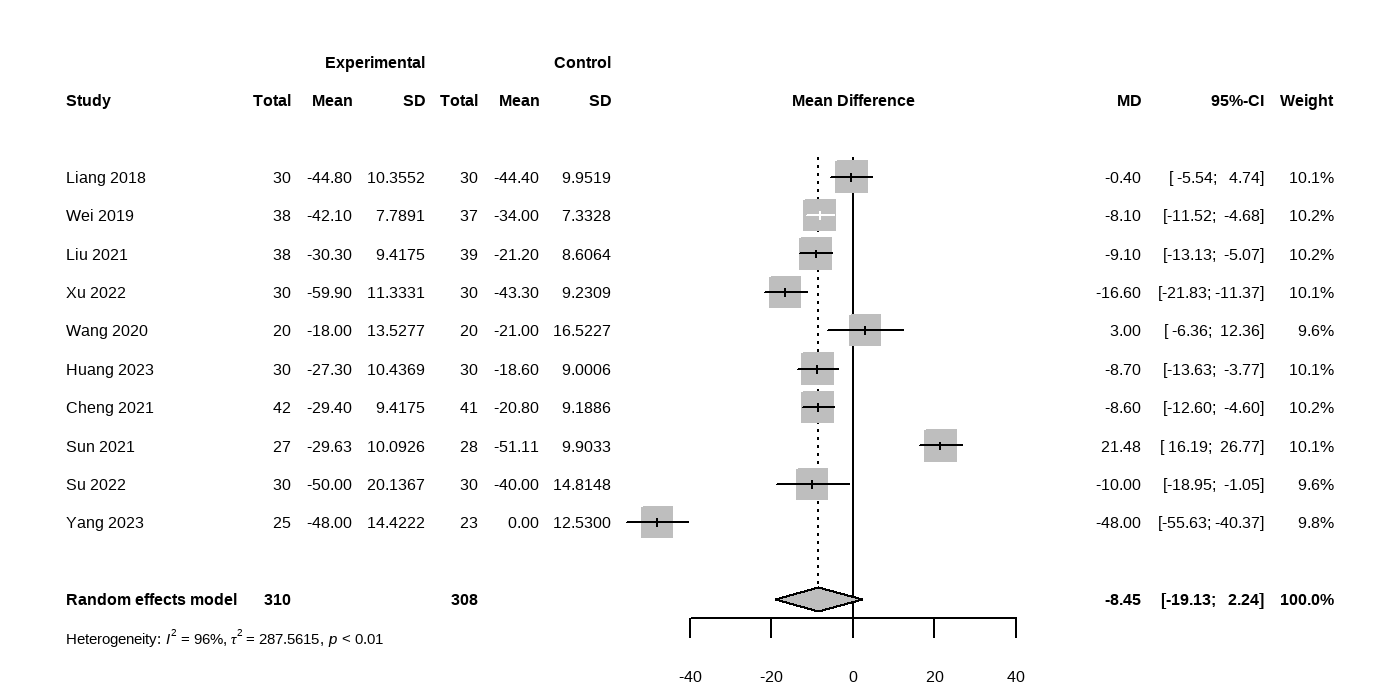


**Figure S28 The change of VAS from baseline to the end of treatment between acupuncture and NSAIDs**


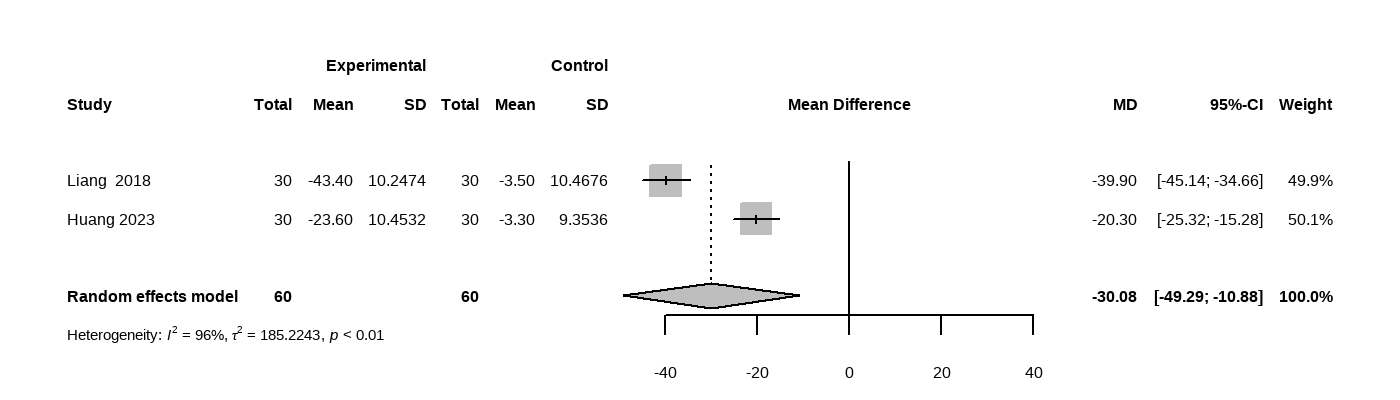


**Figure S29 The change of VAS from baseline to 1 menstrual cycle post-treatment between acupuncture and NSAIDs**


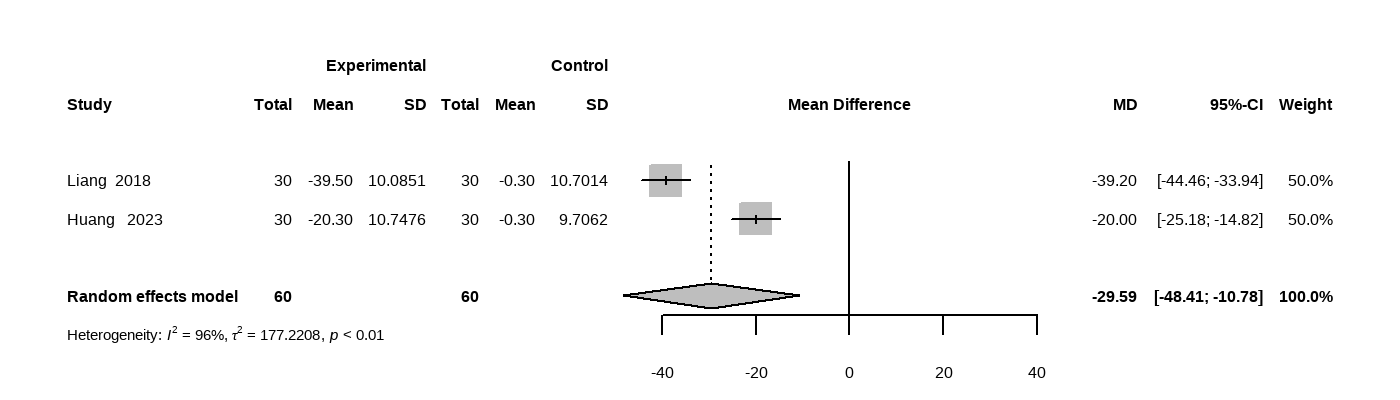


**Figure S30 The change of VAS from baseline to 2 menstrual cycles post-treatment between acupuncture and NSAIDs**


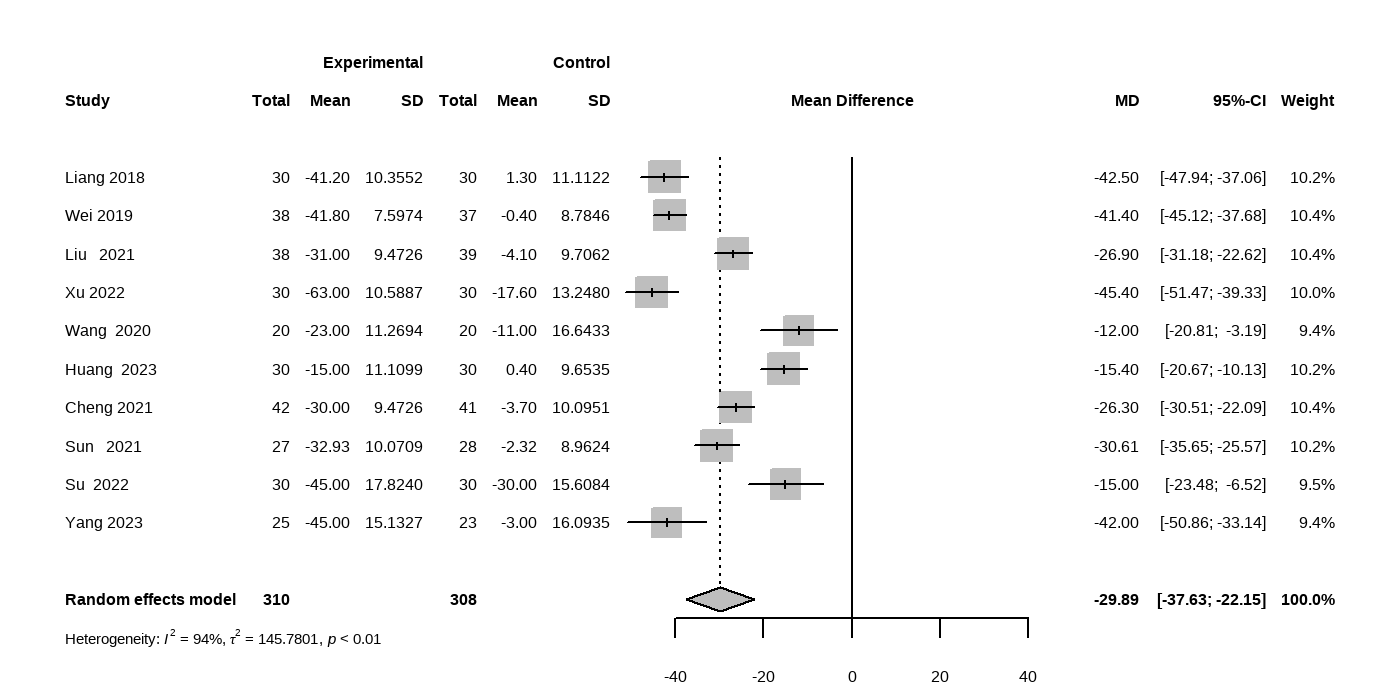


**Figure S31 The change of VAS from baseline to 3 menstrual cycles post-treatment between acupuncture and NSAIDs**


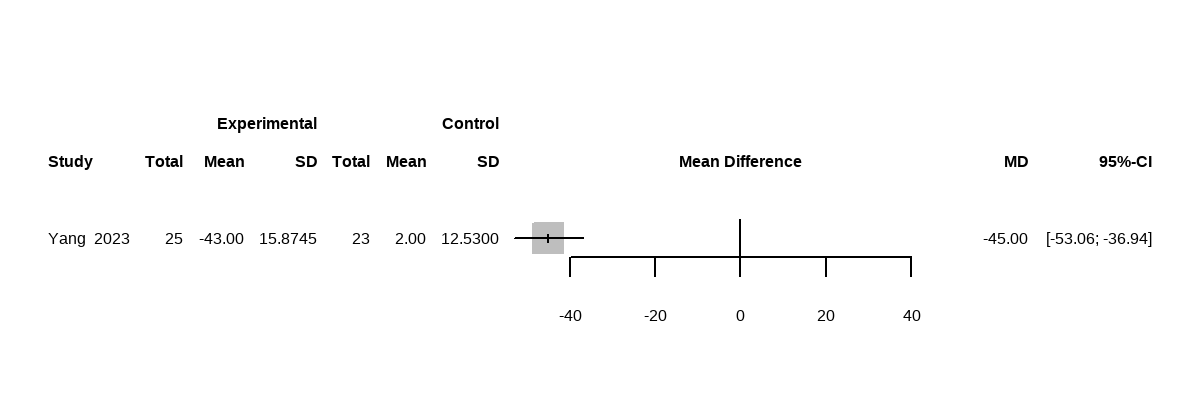


**Figure S32 The change of VAS from baseline to 6 menstrual cycles post-treatment between acupuncture and NSAIDs**


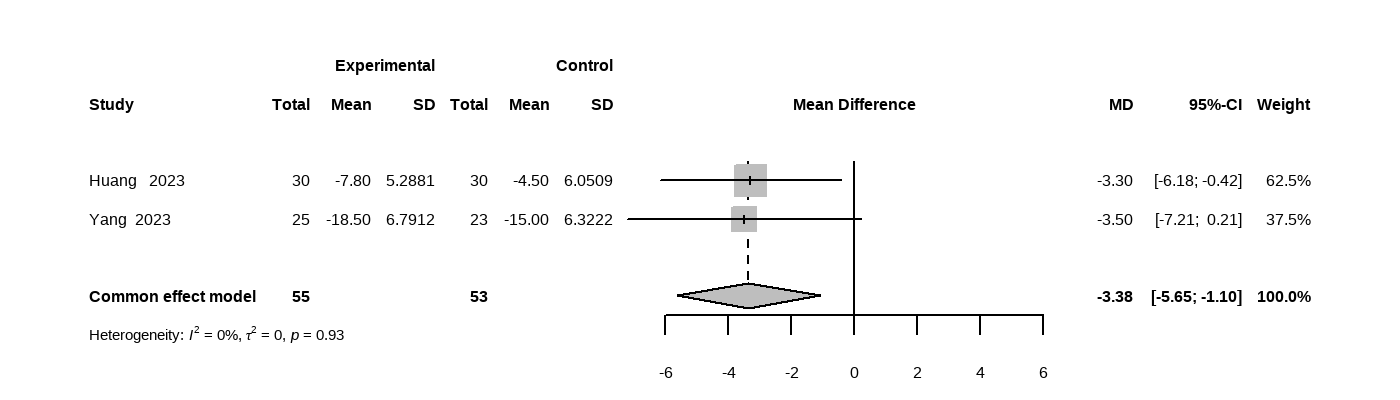


**Figure S33 The change of CMSS from baseline to the end of treatment between acupuncture and NSAIDs**


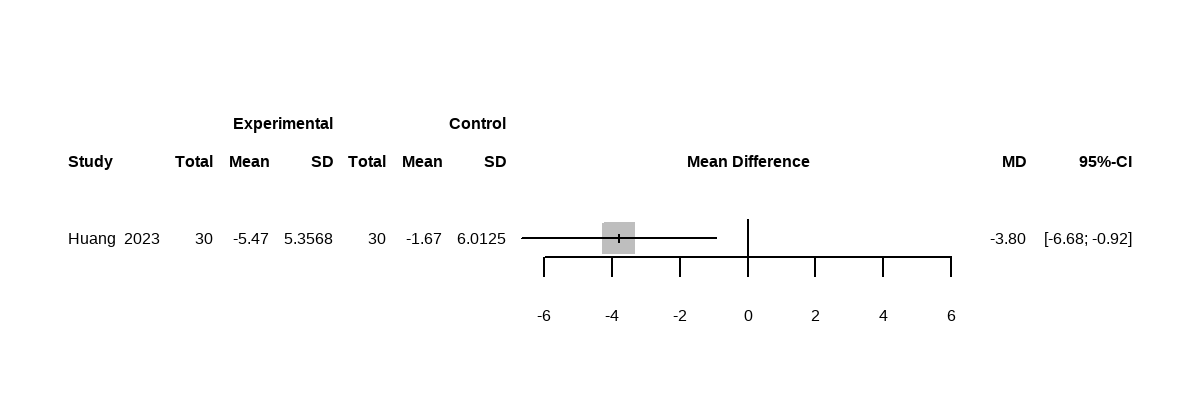


**Figure S34 The change of CMSS from baseline to 1 menstrual cycle post-treatment betwwen acupuncture and NSAIDs**


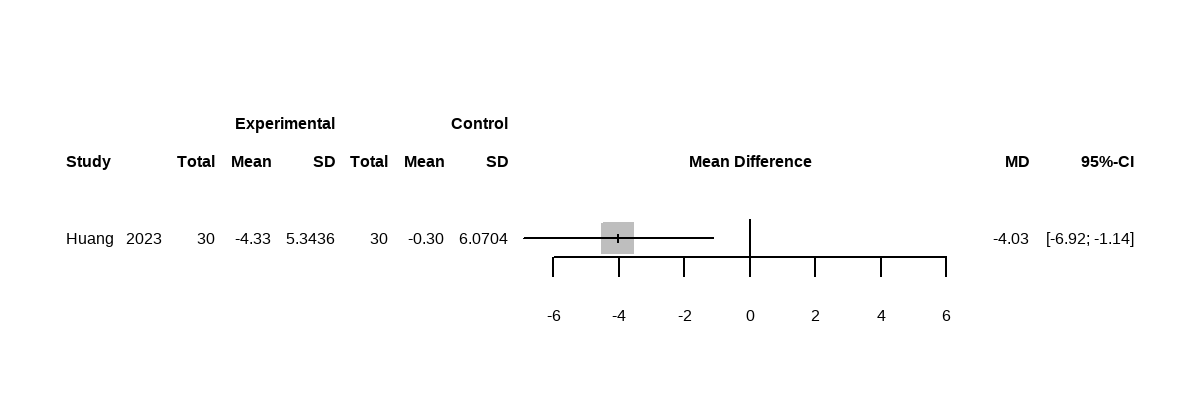


**Figure S35 The change of CMSS from baseline to 2 menstrual cycles post-treatment between acupuncture and NSAIDs**


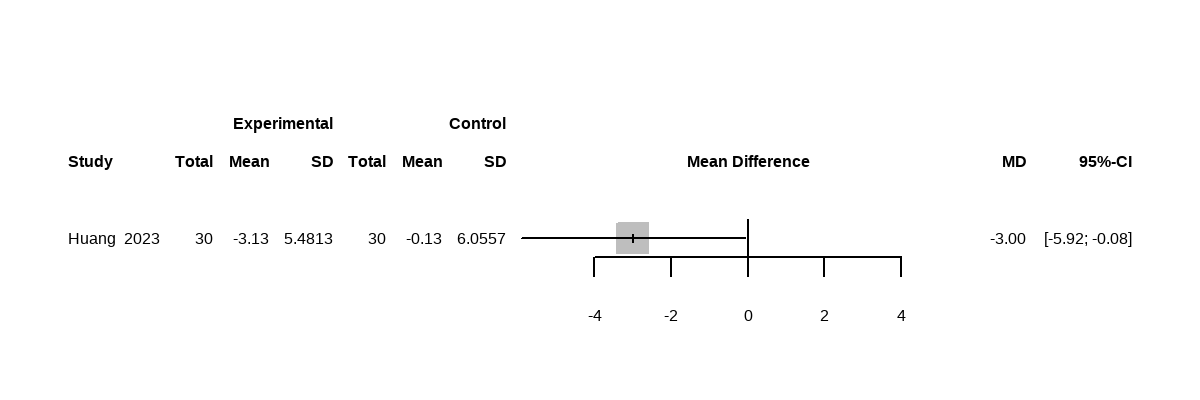


**Figure S36 The change of CMSS from baseline to 3 menstrual cycles post-treatment between acupuncture and NSAIDs**


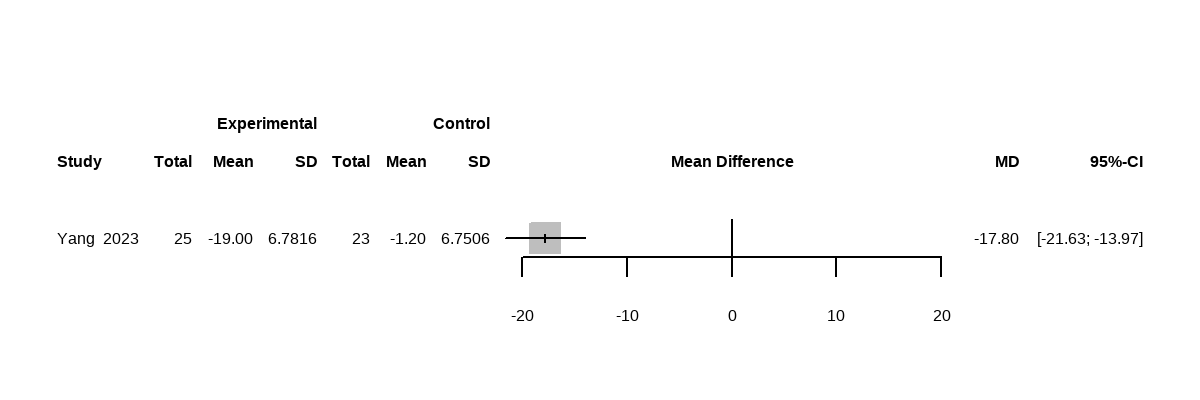


**Figure S37 The change of CMSS from baseline to 6 menstrual cycles post-treatment between acupuncture and NSAIDs**


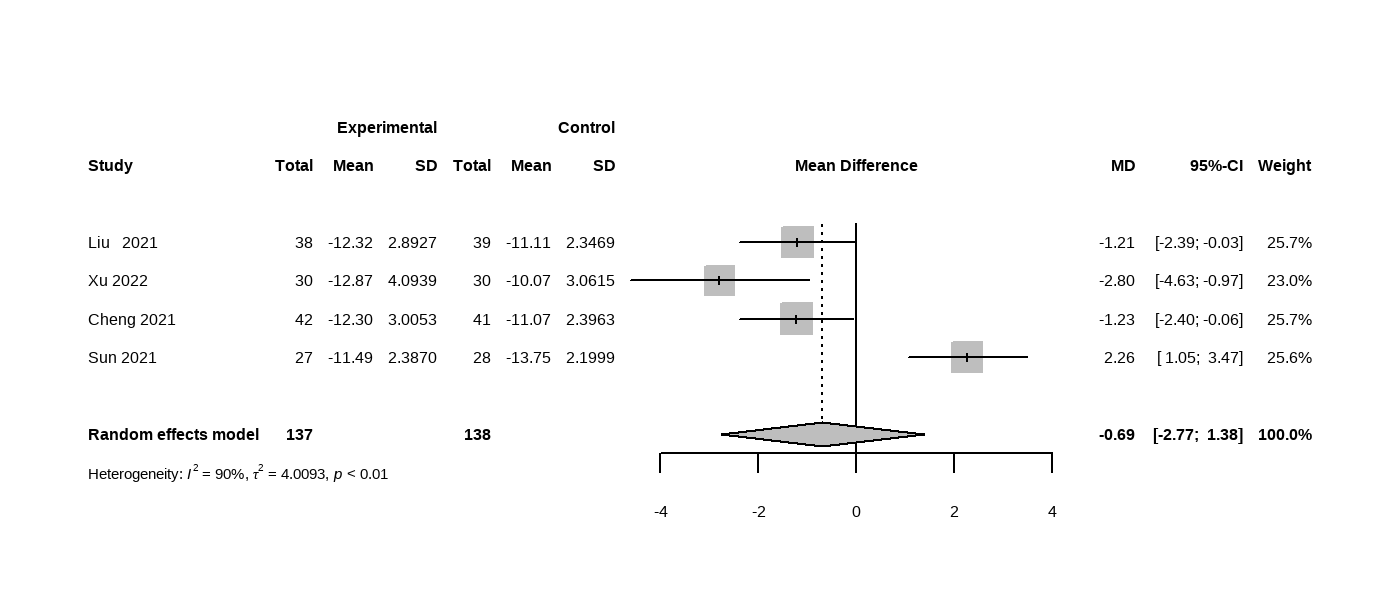


**Figure S38 The change of CMSS duration from baseline to the end of treatment between acupuncture and NSAIDs**


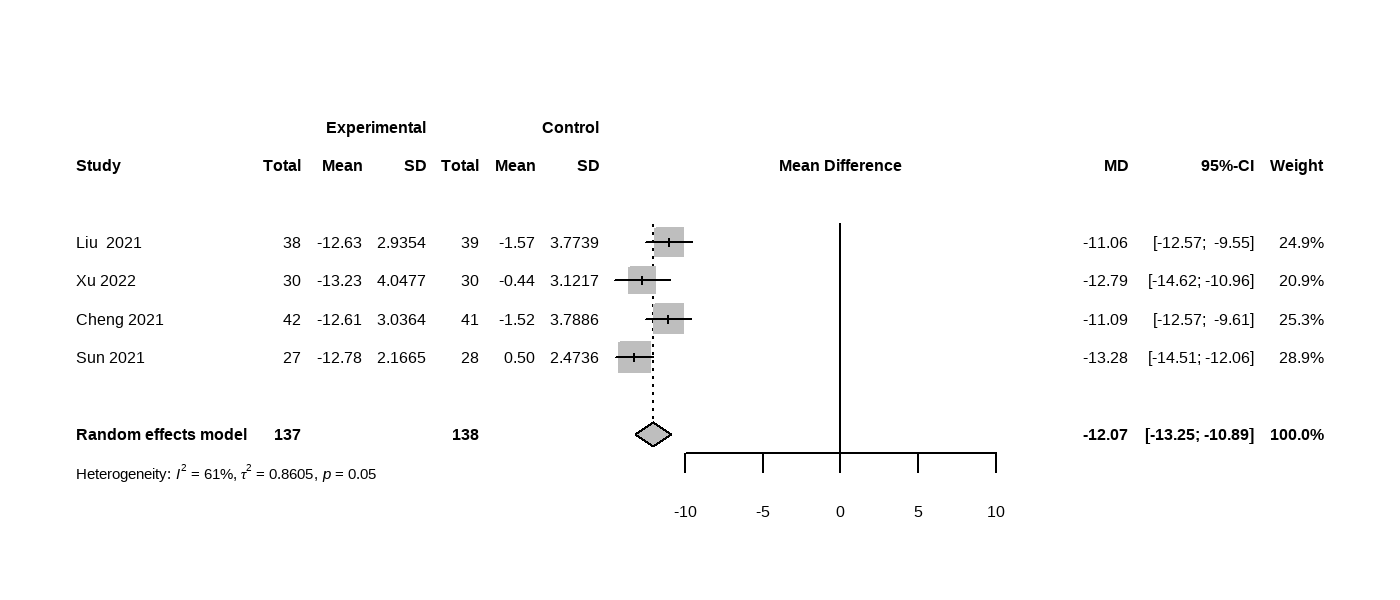


**Figure S39 The change of CMSS duration from baseline to 3 menstrual cycles post-treatment between acupuncture and NSAIDs**


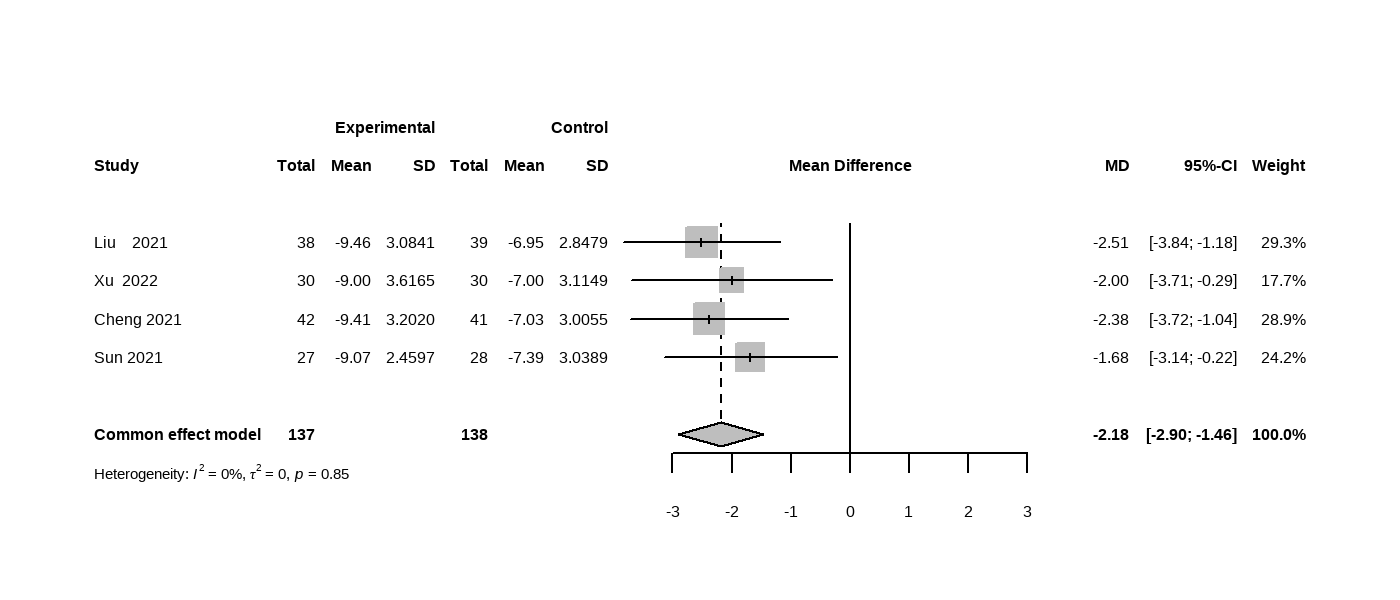


**Figure S40 The change of CMSS severity from baseline to the end of treatment between acupuncture and NSAIDs**


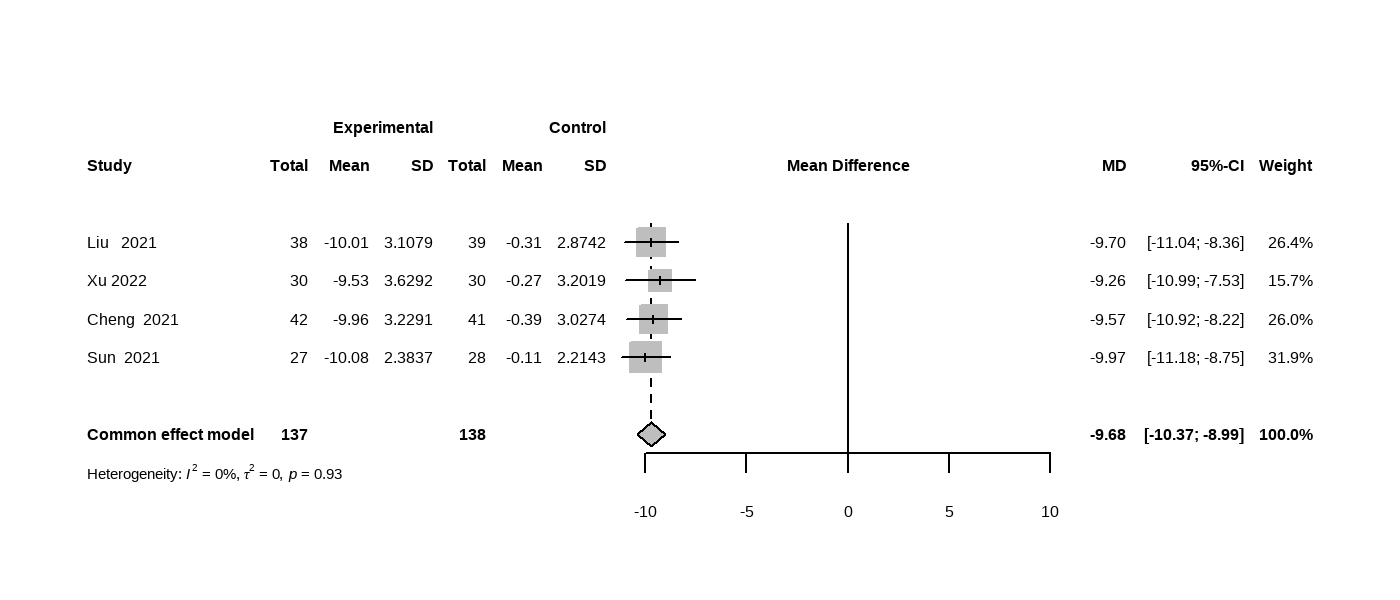


**Figure S41 The change of CMSS severity from baseline to 3 menstrual cycles post-treatment between acupuncture and NSAIDs**


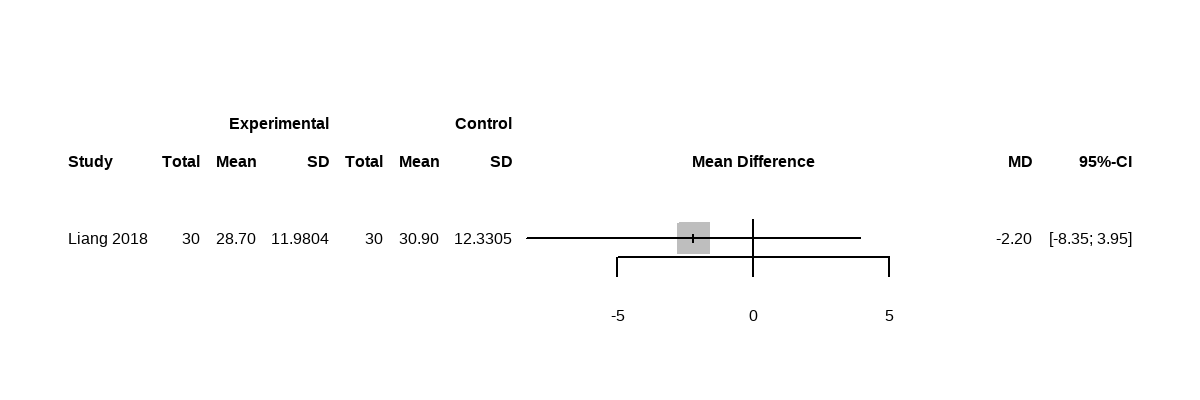


**Figure S42 The change of SF-36 from baseline to the end of treatment between acupuncture versus NSAIDs**


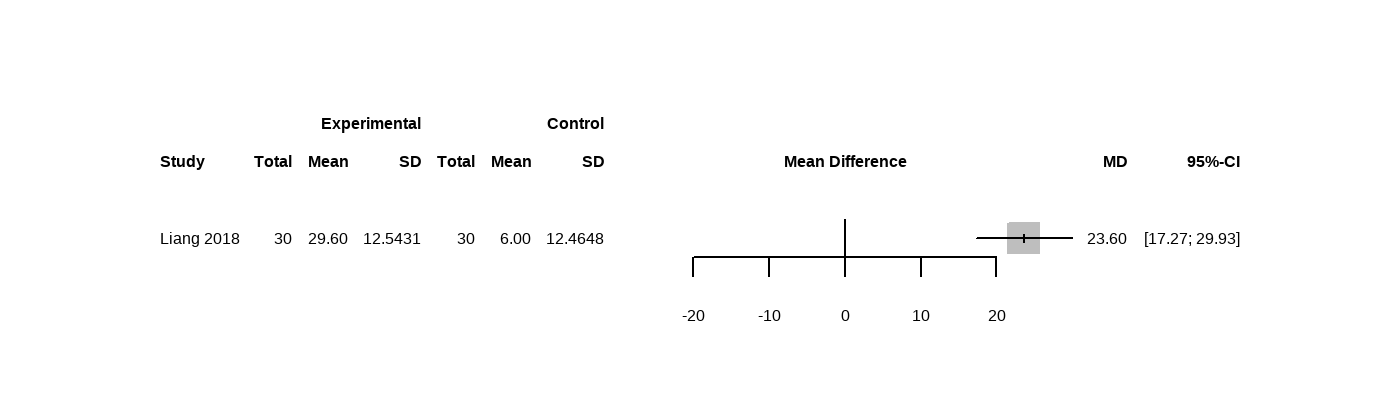


**Figure S43 The change of SF-36 from baseline to 1 menstrual cycle post-treatment between acupuncture and NSAIDs**


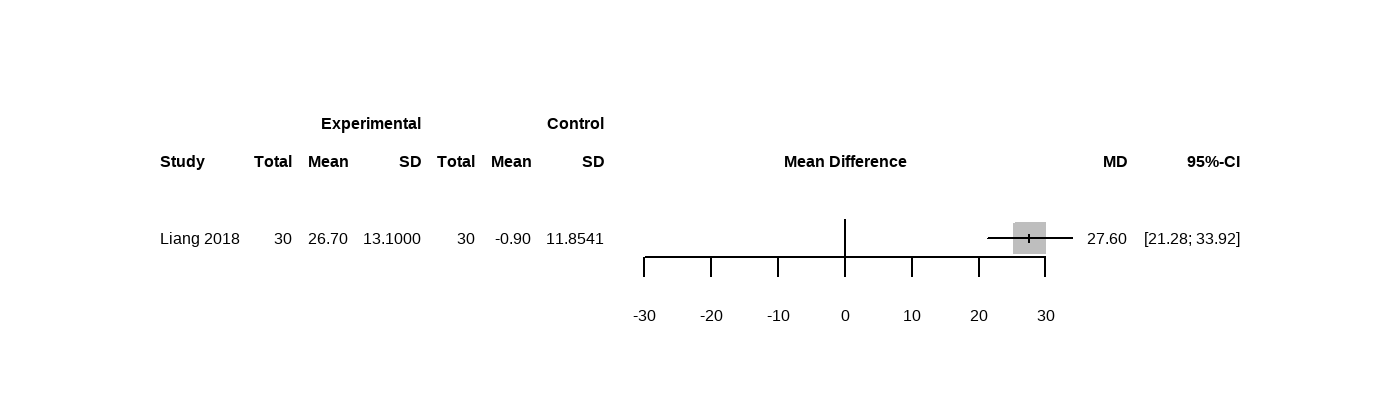


**Figure S44 The change of SF-36 from baseline to 2 menstrual cycles post-treatment between acupuncture and NSAIDs**


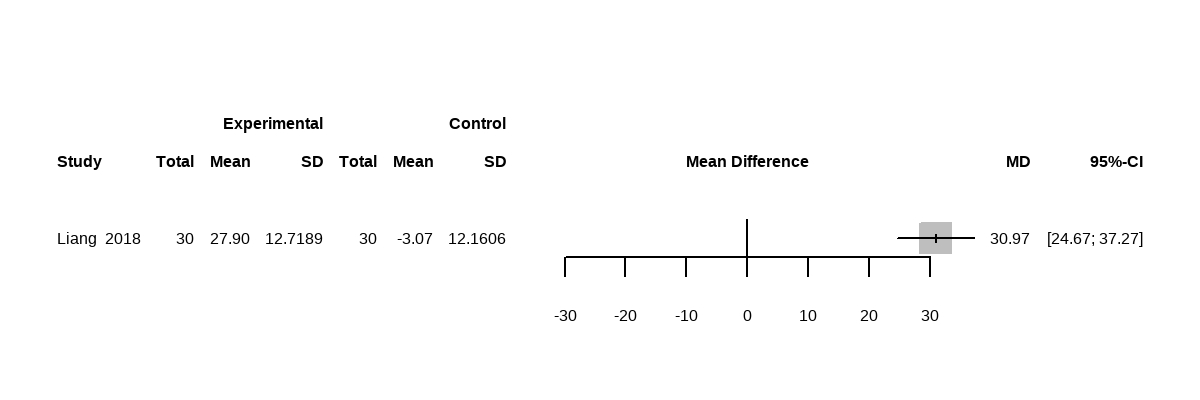


**Figure S45 The change of SF-36 from baseline to 3 menstrual cycles post-treatment between acupuncture and NSAIDs**


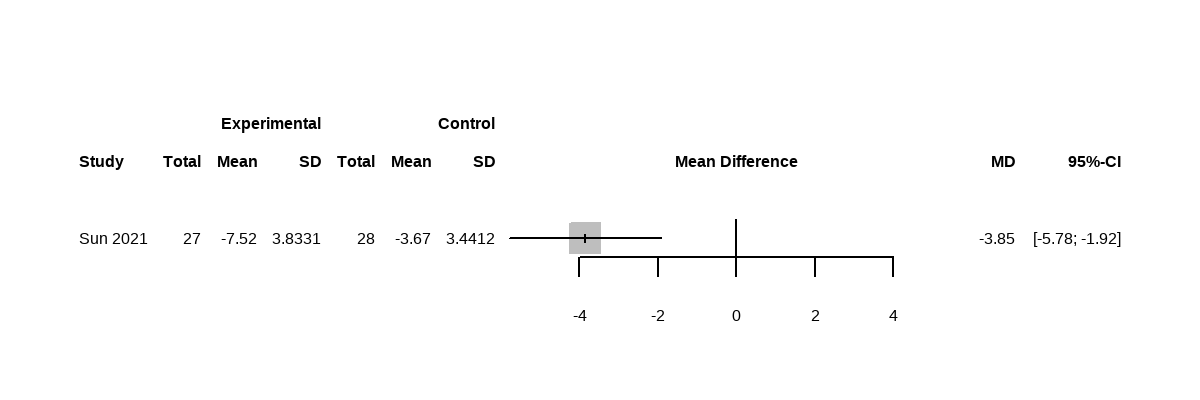


**Figure S46 The change of HAMA from baseline to the end of treatment between acupuncture and NSAIDs**


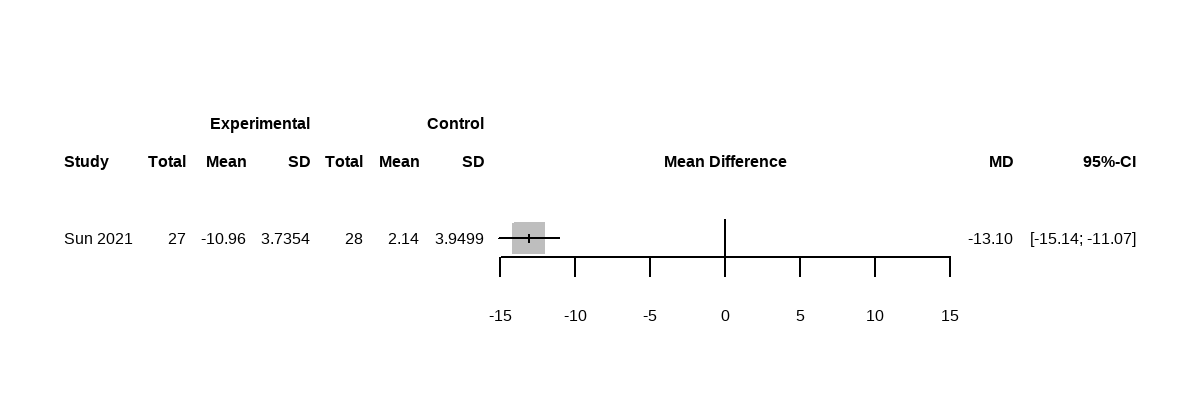


**Figure S47 The change of HAMA from baseline to 3 menstrual cycles post-treatment between acupuncture and NSAIDs**


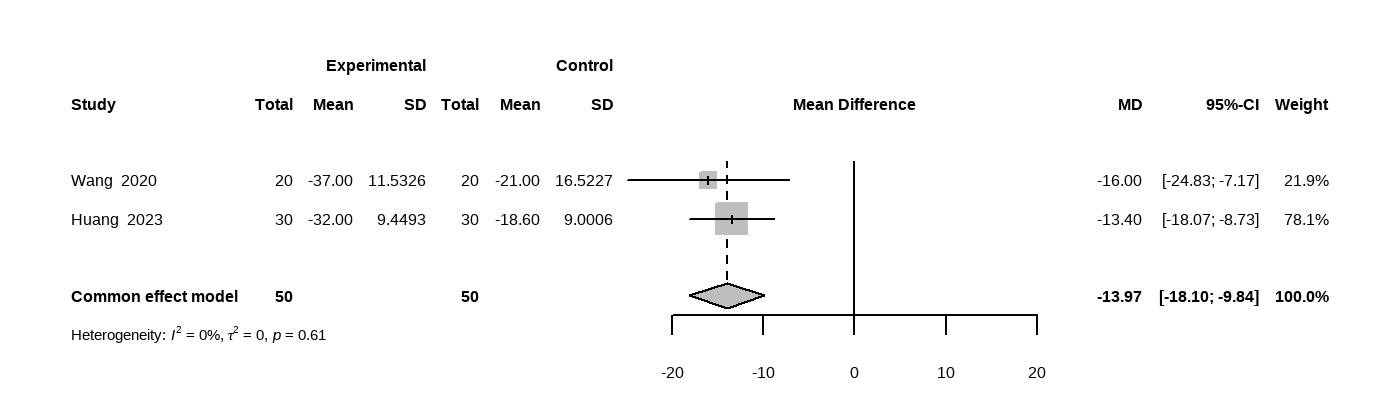


**Figure S48 The change of VAS from baseline to the end of treatment between acupuncture plus NSAIDs and NSAIDs**


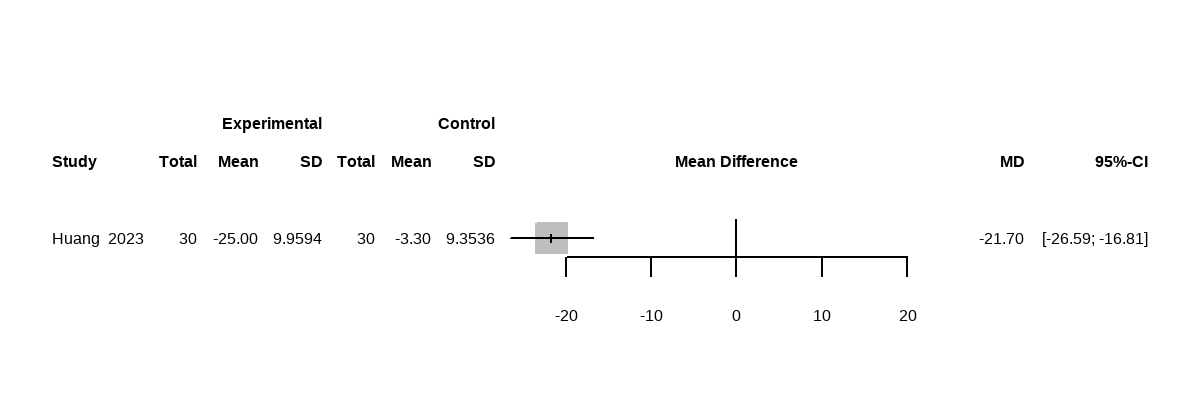


**Figure S49 The change of VAS from baseline to 1 menstrual cycle post-treatment between acupuncture plus NSAIDs and NSAIDs**


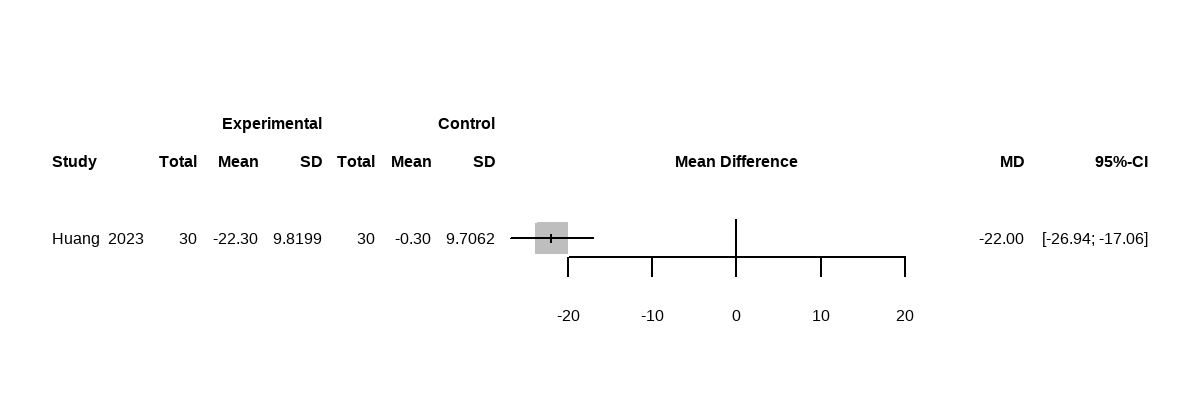


**Figure S50 The change of VAS from baseline to 2 menstrual cycles post-treatment between acupuncture plus NSAIDs and NSAIDs**


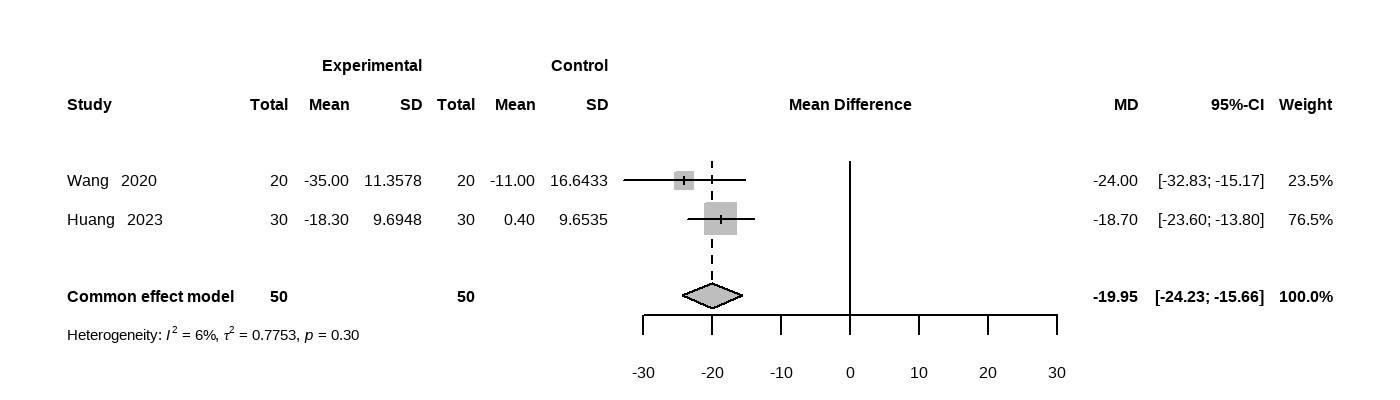


**Figure S51 The change of VAS from baseline to 3 menstrual cycles post-treatment between acupuncture plus NSAIDs and NSAIDs**


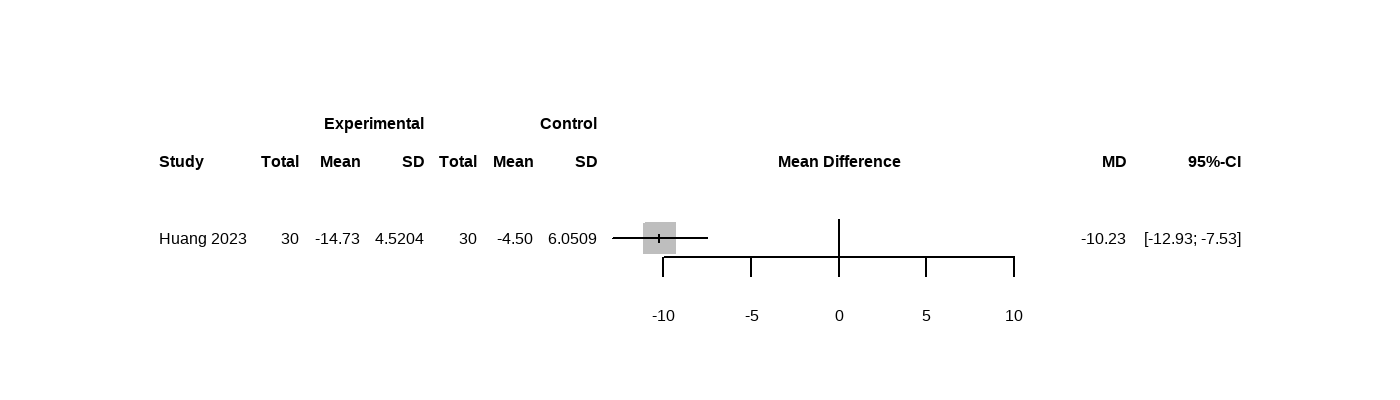


**Figure S52 The change of CMSS from baseline to the end of treatment between acupuncture plus NSAIDs and NSAIDs**


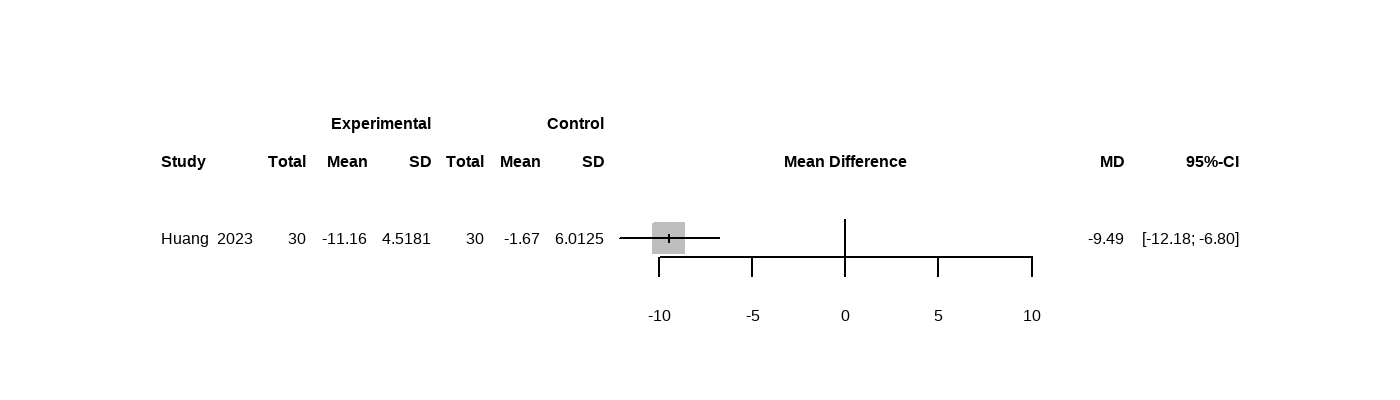


**Figure S53 The change of CMSS from baseline to 1 menstrual cycle post-treatment between acupuncture plus NSAIDs and NSAIDs**


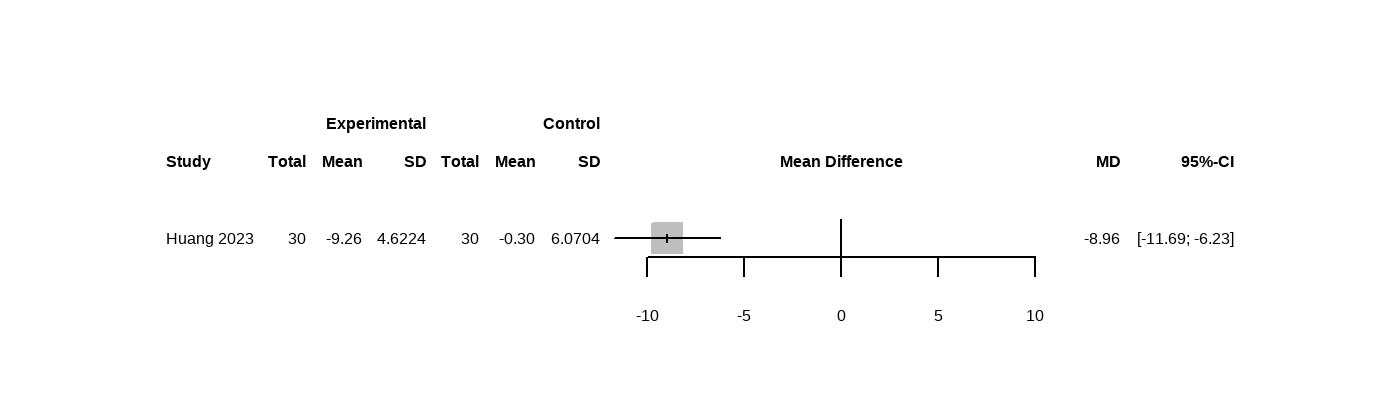


**Figure S54 The change of CMSS from baseline to 2 menstrual cycles post-treatment between acupuncture plus NSAIDs and NSAIDs**


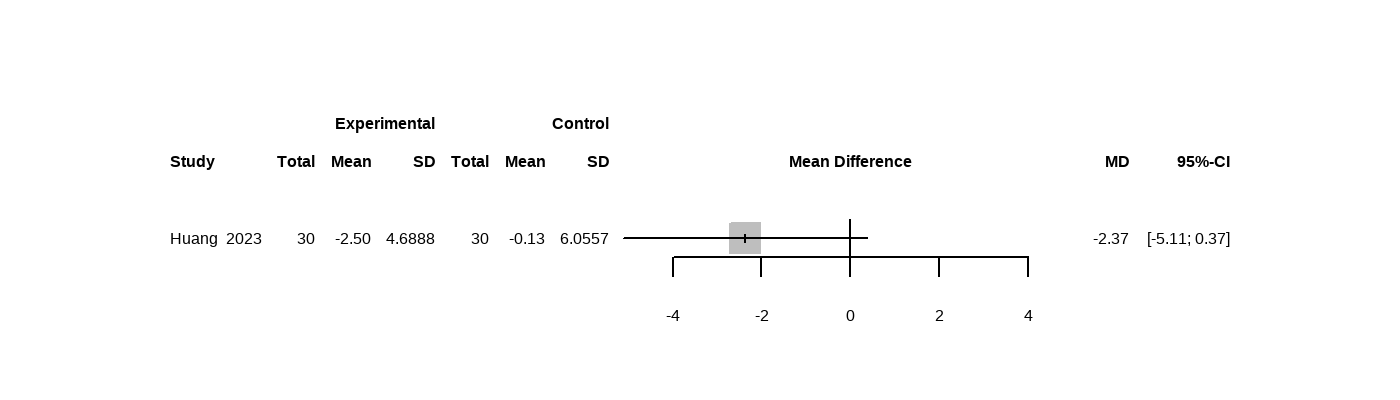


**Figure S55 The change of CMSS from baseline to 3 menstrual cycles post-treatment between acupuncture plus NSAIDs and NSAIDs**


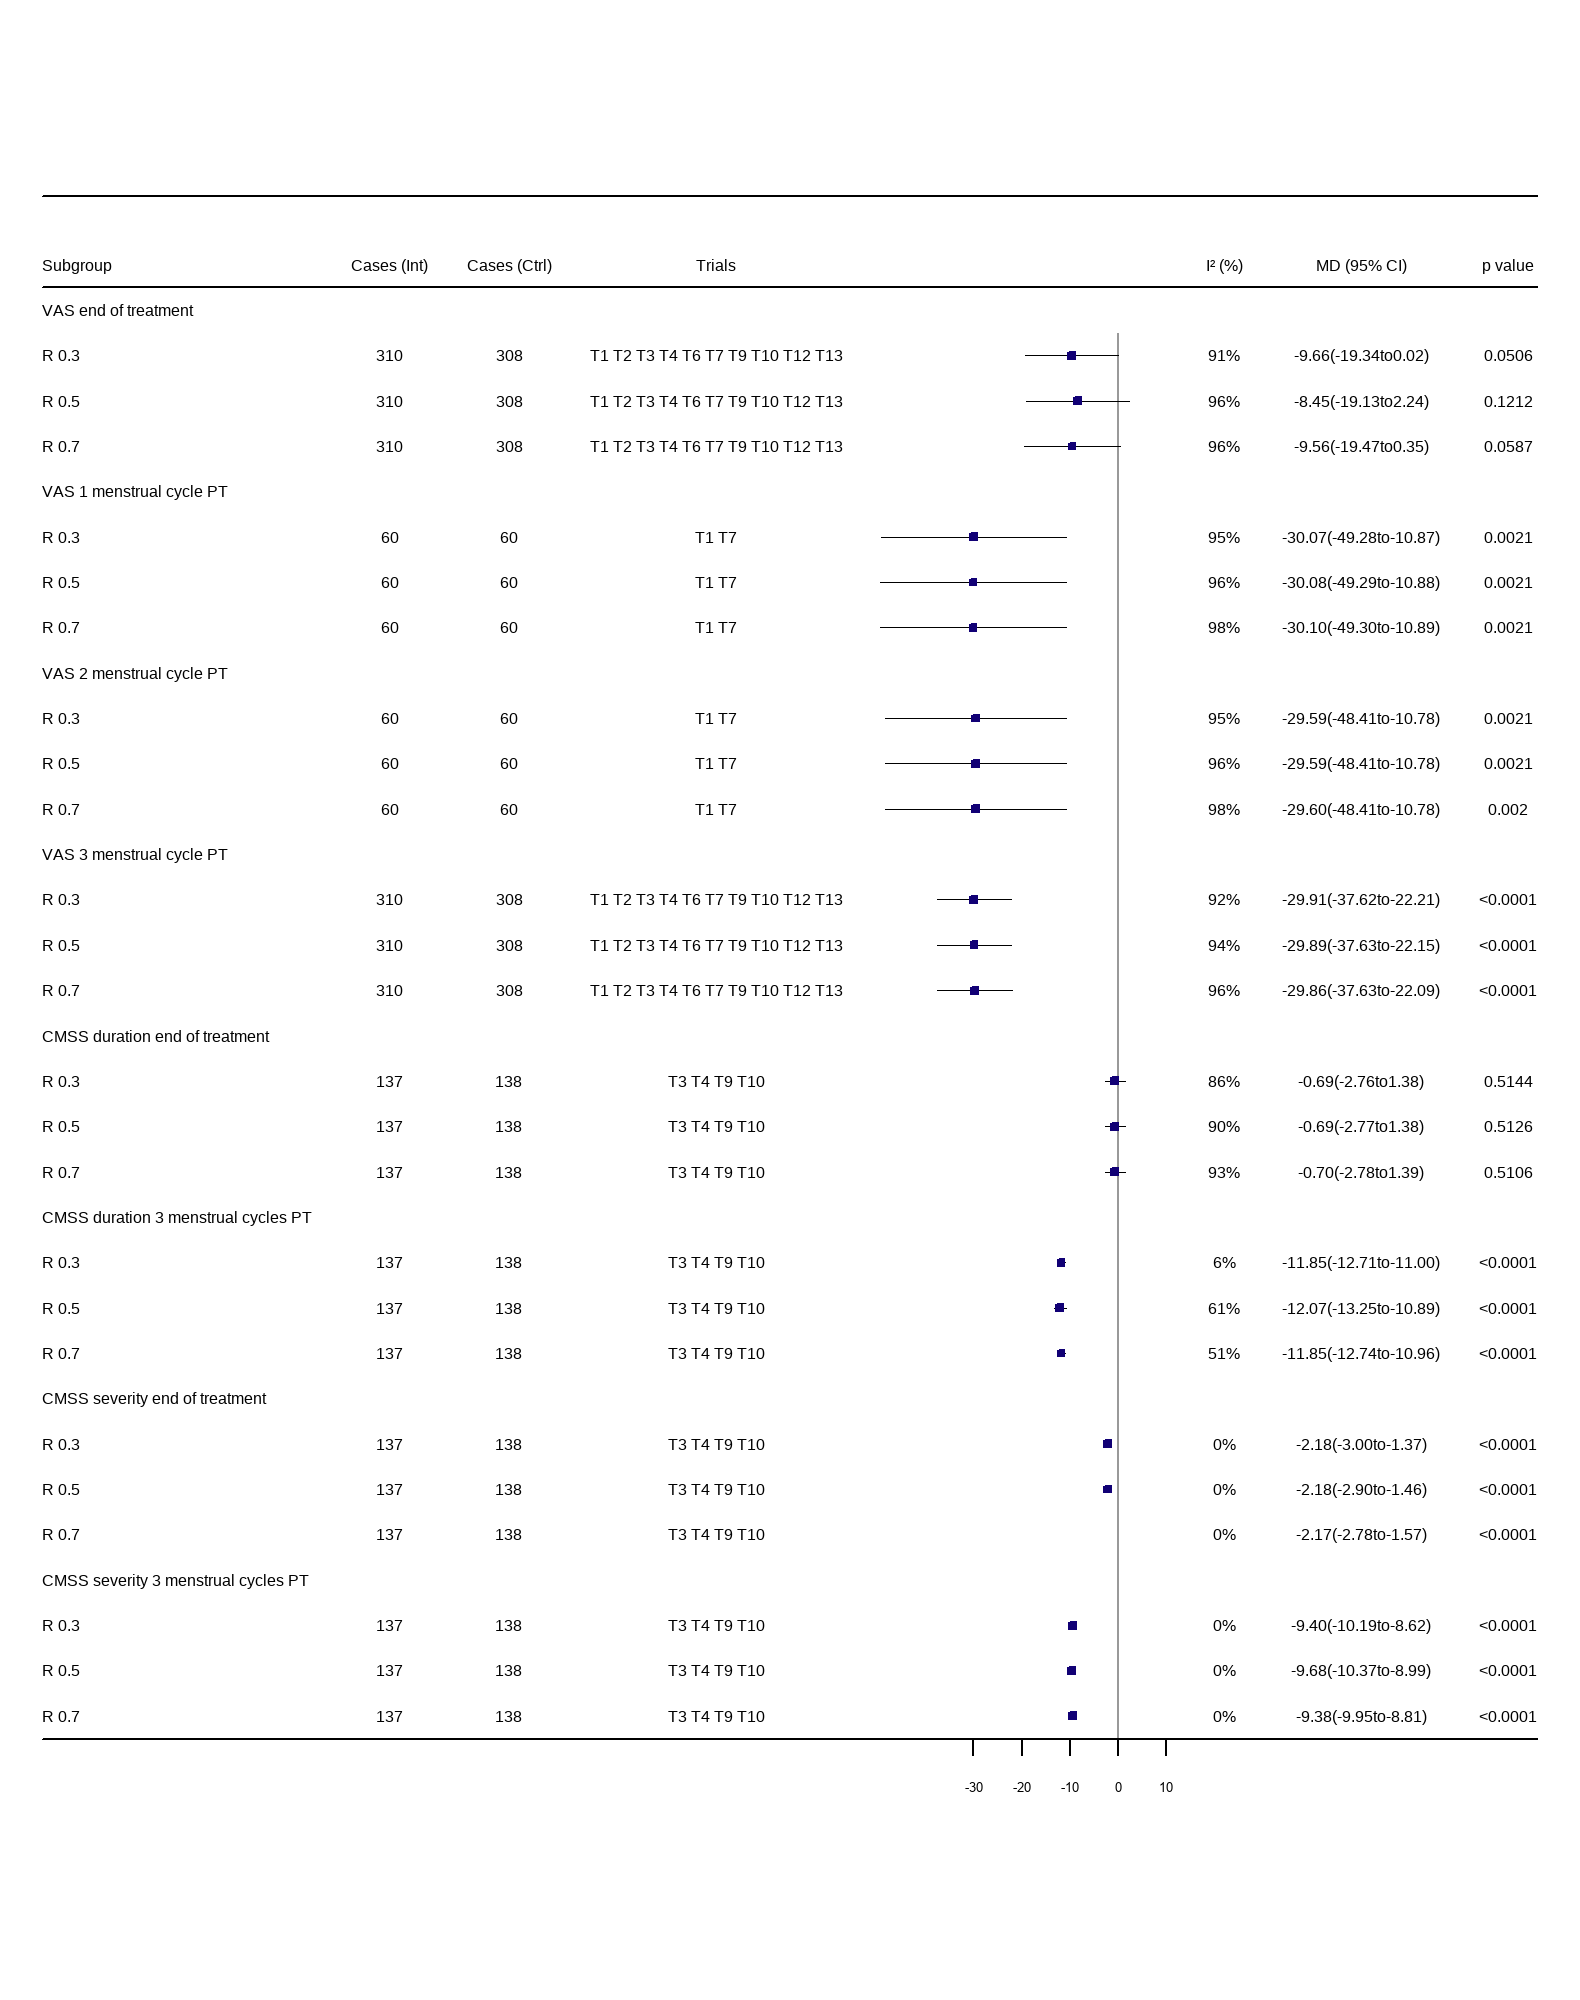


R: correlation coefficients

**Figure S56** **Sensitivity analysis of different correlation coefficients in comparison between acupuncture and NSAIDs**


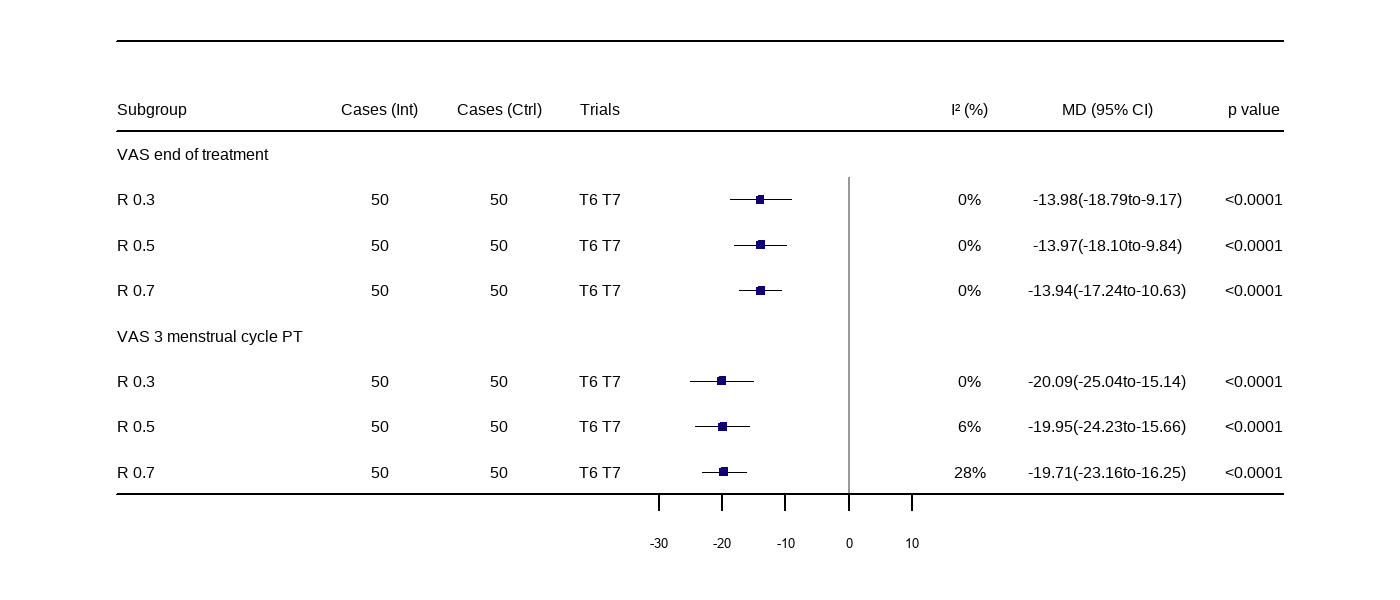


R: correlation coefficients

**Figure S57** **Sensitivity analysis of different correlation coefficients in comparison between acupuncture plus NSAIDs and NSAIDs alone**

**Table S5 Grade of Acupuncture Versus No treatment**

| **Certainty assessment** | | | | | | | **№ of patients** | | | **Effect** | **Certainty** |
| --- | --- | --- | --- | --- | --- | --- | --- | --- | --- | --- | --- |
| Studies | Design | Risk of bias | Inconsistency | Indirectness | Imprecision | Other considerations | Acupuncture | | Comparison | Absolute (95% CI) |
| | **SF-MPQ at end of treatment** | | --- | | | | | | | | | | | | |
| 1 | RCT | Serious a | Not serious | Not serious | Serious b | None | 31 | 31 | | MD 5.67 lower (8.52 lower to 2.82 lower) | ⨁⨁◯◯ Low a, b |
| **SF-MPQ at 3 menstrual cycles PT** | | | | | | | | | | | |
| 1 | RCT | Serious a | Not serious | Not serious | Serious b | None | 31 | 31 | | MD 8.55 lower (11.46 lower to 5.64 lower) | ⨁⨁◯◯ Low a, b |
| **VAS at end of treatment** | | | | | | | | | | | |
| 1 | RCT | Serious a | Not serious | Not serious | Serious b | None | 48 | 48 | | MD 48.40 lower (49.23 lower to 47.57 lower) | ⨁⨁◯◯ Low a, b |
| **VAS at 1 menstrual cycle PT** | | | | | | | | | | | |
| 1 | RCT | Serious a | Not serious | Not serious | Serious b | None | 48 | 48 | | MD 48.00 lower (48.83 lower to 47.17 lower) | ⨁⨁◯◯ Low a, b |
| **VAS at 2 menstrual cycles PT** | | | | | | | | | | | |
| 1 | RCT | Serious a | Not serious | Not serious | Serious b | None | 48 | 48 | | MD 48.60 lower (49.44 lower to 47.76 lower) | ⨁⨁◯◯ Low a, b |
| **VAS at 3 menstrual cycles PT** | | | | | | | | | | | |
| 1 | RCT | Serious a | Not serious | Not serious | Serious b | None | 48 | 48 | | MD 47.80 lower (48.63 lower to 46.97 lower) | ⨁⨁◯◯ Low a, b |
| **Duration of pain at end of treatment** | | | | | | | | | | | |
| 1 | RCT | Serious a | Not serious | Not serious | Serious b | None | 48 | 48 | | MD 27.91 lower (28.86 lower to 26.96 lower) | ⨁⨁◯◯ Low a, b |
| **Duration of pain at 1 menstrual cycle PT** | | | | | | | | | | | |
| 1 | RCT | Serious a | Not serious | Not serious | Serious b | None | 48 | 48 | | MD 27.91 lower (28.85 lower to 26.97 lower) | ⨁⨁◯◯ Low a, b |
| **Duration of pain at 2 menstrual cycles PT** | | | | | | | | | | | |
| 1 | RCT | Serious a | Not serious | Not serious | Serious b | None | 48 | 48 | | MD 27.93 lower (28.88 lower to 26.98 lower) | ⨁⨁◯◯ Low a, b |
| **Duration of pain at 3 menstrual cycles PT** | | | | | | | | | | | |
| 1 | RCT | Serious a | Not serious | Not serious | Serious b | None | 48 | 48 | | MD 27.99 lower (28.94 lower to 27.04 lower) | ⨁⨁◯◯ Low a, b |
| **CMSS duration at end of treatment** | | | | | | | | | | | |
| 1 | RCT | Serious a | Not serious | Not serious | Serious b | None | 31 | 31 | | MD 12.11 lower (16.09 lower to 8.13 lower) | ⨁⨁◯◯ Low a, b |
| **CMSS duration at 3 menstrual cycles PT** | | | | | | | | | | | |
| 1 | RCT | Serious a | Not serious | Not serious | Serious b | None | 31 | 31 | | MD 18.24 lower (22.39 lower to 14.09 lower) | ⨁⨁◯◯ Low a, b |
| **CMSS severity at end of treatment** | | | | | | | | | | | |
| 1 | RCT | Serious a | Not serious | Not serious | Serious b | None | 31 | 31 | | MD 6.66 lower (9.96 lower to 3.36 lower) | ⨁⨁◯◯ Low a, b |
| **CMSS severity at 3 menstrual cycles PT** | | | | | | | | | | | |
| 1 | RCT | Serious a | Not serious | Not serious | Serious b | None | 31 | 31 | | MD 12.96 lower (16.41 lower to 9.51 lower) | ⨁⨁◯◯ Low a, b |

RCT: randomized trial; CI: Confidence interval; MD: Mean difference; a: Downgrade by 1 level for high risk and some concerns in some studies; b: Downgraded by 1 level for small sample size

**Table S6 Grade of Acupuncture Versus SA**

| **Certainty assessment** | | | | | | | **№ of patients** | | **Effect** | **Certainty** |
| --- | --- | --- | --- | --- | --- | --- | --- | --- | --- | --- |
| Studies | Design | Risk of bias | Inconsistency | Indirectness | Imprecision | Other considerations | Acupuncture | Comparison | Absolute (95% CI) |
| | **VAS at end of treatment** | | --- | | | | | | | | | | | |
| 1 | RCT | Serious a | Not serious | Not serious | Serious b | None | 30 | 30 | MD 17.26 lower (22.91 lower to 11.61 lower) | ⨁⨁◯◯ Low a, b |
| **VAS at 1 menstrual cycle PT** | | | | | | | | | | |
| 1 | RCT | Serious a | Not serious | Not serious | Serious b | None | 30 | 30 | MD 19.79 lower (25.60 lower to 13.98 lower) | ⨁⨁◯◯ Low a, b |
| **MPQ at end of treatment** | | | | | | | | | | |
| 1 | RCT | Serious a | Not serious | Not serious | Serious b | None | 46 | 46 | MD 0.50 higher (0.69 lower to 1.69higher) | ⨁⨁◯◯ Low a, b |
| **MPQ at 3 menstrual cycles PT** | | | | | | | | | | |
| 1 | RCT | Serious a | Not serious | Not serious | Serious b | None | 46 | 46 | MD 0.40 lower (0.74 lower to 1.54 higher) | ⨁⨁◯◯ Low a, b |
| **MPQ at 9 menstrual cycles PT** | | | | | | | | | | |
| 1 | RCT | Serious a | Not serious | Not serious | Serious b | None | 46 | 46 | MD 1.30 higher (0.19 higher to 2.41 higher) | ⨁⨁◯◯ Low a, b |
| **SF-36 physical component at end of treatment** | | | | | | | | | | |
| 1 | RCT | Serious a | Not serious | Not serious | Serious b | None | 46 | 46 | MD 2.60 lower (5.91 lower to 0.71 higher) | ⨁⨁◯◯ Low a, b |
| **SF-36 physical component at 3 menstrual cycles PT** | | | | | | | | | | |
| 1 | RCT | Serious a | Not serious | Not serious | Serious b | None | 46 | 46 | MD 0.80 higher (2.61 lower to 4.21 higher) | ⨁⨁◯◯ Low a, b |
| **SF-36 physical component at 9 menstrual cycles PT** | | | | | | | | | | |
| 1 | RCT | Serious a | Not serious | Not serious | Serious b | None | 46 | 46 | MD 0.00  (3.42 lower to 3.42 higher) | ⨁⨁◯◯ Low a, b |
| **SF-36 mental component at end of treatment** | | | | | | | | | | |
| 1 | RCT | Serious a | Not serious | Not serious | Serious b | None | 46 | 46 | MD 3.90 higher (0.78 lower to 8.58 higher) | ⨁⨁◯◯ Low a, b |
| **SF-36 mental component at 3 menstrual cycles PT** | | | | | | | | | | |
| 1 | RCT | Serious a | Not serious | Not serious | Serious b | None | 46 | 46 | MD 2.50 lower (7.04 lower to 2.04 higher) | ⨁⨁◯◯ Low a, b |
| **SF-36 mental component at 9 menstrual cycles PT** | | | | | | | | | | |
| 1 | RCT | Serious a | Not serious | Not serious | Serious b | None | 46 | 46 | MD 0.30 higher (4.11 lower to 4.71 higher) | ⨁⨁◯◯ Low a, b |
| **CMSS at end of treatment** | | | | | | | | | | |
| 1 | RCT | Serious a | Not serious | Not serious | Serious b | None | 30 | 30 | MD 4.06 lower (5.37 lower to 2.75 lower) | ⨁⨁◯◯ Low a, b |
| **CMSS at 1 menstrual cycle PT** | | | | | | | | | | |
| 1 | RCT | Serious a | Not serious | Not serious | Serious b | None | 30 | 30 | MD 7.11 lower (8.46 lower to 5.76 lower) | ⨁⨁◯◯ Low a, b |

RCT: randomized trial; CI: Confidence interval; MD: Mean difference; a: Downgrade by 1 level for high risk and some concerns in some studies; b: Downgraded by 1 level for small sample size

**Table S7 Grade of Acupuncture Versus NSAIDs**

| **Certainty assessment** | | | | | | | | **№ of patients** | | **Effect** | **Certainty** |  |
| --- | --- | --- | --- | --- | --- | --- | --- | --- | --- | --- | --- | --- |
| Studies | Design | Risk of bias | Inconsistency | | Indirectness | Imprecision | Other considerations | Acupuncture | Comparison | Absolute (95% CI) |  |
| | VAS at end of treatment | | --- | | | | | | | | | | | | |  |
| 10 | RCT | Serious a | | Serious b | Not serious | Serious c | None | 310 | 308 | MD 8.45 lower (19.13 lower to 2.24 higher) | ⨁◯◯◯ Very low a, b, c |  |
| **VAS at 1 menstrual cycle PT** | | | | | | | | | | | |  |
| 2 | RCT | Serious a | | Serious b | Not serious | Serious c | None | 60 | 60 | MD 30.08 lower (49.29 lower to 10.88 lower) | ⨁◯◯◯ Very low a, b, c |  |
| **VAS at 2 menstrual cycles PT** | | | | | | | | | | | |  |
| 2 | RCT | Serious a | | Serious b | Not serious | Serious c | None | 60 | 60 | MD 29.59 lower (48.41 lower to 10.78 lower) | ⨁◯◯◯ Very low a, b, c |  |
| **VAS at 3 menstrual cycles PT** | | | | | | | | | | | |  |
| 10 | RCT | Serious a | | Serious b | Not serious | Serious c | None | 310 | 308 | MD 29.89 lower (37.63 lower to 22.15 lower) | ⨁◯◯◯ Very low a, b, c |  |
| **VAS at 6 menstrual cycles PT** | | | | | | | | | | | |  |
| 1 | RCT | Serious a | | Not serious | Not serious | Serious c | None | 25 | 23 | MD 45.00 lower (53.06 lower to 36.94 lower) | ⨁⨁◯◯ Low a, c |  |
| **CMSS at end of treatment** | | | | | | | | | | | |  |
| 2 | RCT | Serious a | | Not serious | Not serious | Serious c | None | 55 | 53 | MD 3.38 lower (5.65 lower to 1.10 lower) | ⨁⨁◯◯ Low a, c |  |
| **CMSS at 1 menstrual cycle PT** | | | | | | | | | | | |  |
| 1 | RCT | Serious a | | Not serious | Not serious | Serious c | None | 30 | 30 | MD 3.80 lower (6.68 lower to 0.92 lower) | ⨁⨁◯◯ Low a, c |  |
| **CMSS at 2 menstrual cycles PT** | | | | | | | | | | | |  |
| 1 | RCT | Serious a | | Not serious | Not serious | Serious c | None | 30 | 30 | MD 4.03 lower (6.92 lower to 1.14 lower) | ⨁⨁◯◯ Low a, c |  |
| **CMSS at 3menstrual cycles PT** | | | | | | | | | | | |  |
| 1 | RCT | Serious a | | Not serious | Not serious | Serious c | None | 30 | 30 | MD 3.00 lower (5.92 lower to 0.08 lower) | ⨁⨁◯◯ Low a, c |  |
| **CMSS at 6menstrual cycles PT** | | | | | | | | | | | |  |
| 1 | RCT | Serious a | | Not serious | Not serious | Serious c | None | 25 | 23 | MD 17.80 lower (21.63 lower to 13.97 lower) | ⨁⨁◯◯ Low a, c |  |
| **CMSS duration at end of treatment** | | | | | | | | | | | |  |
| 4 | RCT | Serious a | | Serious b | Not serious | Serious c | None | 137 | 138 | MD 0.69 lower (2.77 lower to 1.38 higher) | ⨁◯◯◯ Very low a, b, c |  |
| **CMSS duration at 3menstrual cycles PT** | | | | | | | | | | | |  |
| 4 | RCT | Serious a | | Serious b | Not serious | Serious c | None | 137 | 138 | MD 12.07 lower (13.25 lower to10.89 lower) | ⨁◯◯◯ Very low a, b, c |  |
| **CMSS severity at end of treatment** | | | | | | | | | | | |  |
| 4 | RCT | Serious a | | Not serious | Not serious | Serious c | None | 137 | 138 | MD 2.18 lower (2.90 lower to 1.46 lower) | ⨁⨁◯◯ Low a, c |  |
| **CMSS severity at 3menstrual cycles PT** | | | | | | | | | | | |  |
| 4 | RCT | Serious a | | Not serious | Not serious | Serious c | None | 137 | 138 | MD 9.68 lower (10.37 lower to 8.99 lower) | ⨁⨁◯◯ Low a, c |  |
| **SF-36 at end of treatment** | | | | | | | | | | | |  |
| 1 | RCT | Serious a | | Not serious | Not serious | Serious c | None | 30 | 30 | MD 2.20 lower (8.35 lower to 3.95 higher) | ⨁⨁◯◯ Low a, c |  |
| **SF-36 at 1 menstrual cycle PT** | | | | | | | | | | | |  |
| 1 | RCT | Serious a | | Not serious | Not serious | Serious c | None | 30 | 30 | MD 23.60 higher (17.27 higher to 29.93 higher) | ⨁⨁◯◯ Low a, c |  |
| **SF-36 at 2 menstrual cycles PT** | | | | | | | | | | | |  |
| 1 | RCT | Serious a | | Not serious | Not serious | Serious c | None | 30 | 30 | MD 27.60 higher (21.28 higher to 33.92 higher) | ⨁⨁◯◯ Low a, c |  |
| **SF-36 at 3 menstrual cycles PT** | | | | | | | | | | | |  |
| 1 | RCT | Serious a | | Not serious | Not serious | Serious c | None | 30 | 30 | MD 30.97 higher (24.67 lower to 37.27 lower) | ⨁⨁◯◯ Low a, c |  |
| **HAMA at end of treatment** | | | | | | | | | | | |  |
| 1 | RCT | Serious a | | Not serious | Not serious | Serious c | None | 27 | 28 | MD 3.85 lower (5.78 lower to 1.92 lower) | ⨁⨁◯◯ Low a, c |  |
| **HAMA at 3 menstrual cycles PT** | | | | | | | | | | | |  |
| 1 | RCT | Serious a | | Not serious | Not serious | Serious c | None | 27 | 28 | MD 13.10 lower (15.14 lower to 11.07 lower) | ⨁⨁◯◯ Low a, c |  |

RCT: randomized trial; CI: Confidence interval; MD: Mean difference; a: Downgrade by 1 level for high risk and some concerns in some studies; b: Downgraded by 1 level for substantial inconsistency (I2>50%); c. Downgraded by 1 level for small sample size

**Table S8 Grade of Acupuncture and NSAIDs Versus NSAIDs**

| **Certainty assessment** | | | | | | | **№ of patients** | | | | **Effect** | **Certainty** |
| --- | --- | --- | --- | --- | --- | --- | --- | --- | --- | --- | --- | --- |
| Studies | Design | Risk of bias | Inconsistency | Indirectness | Imprecision | Other considerations | | Acupuncture | | Comparison | Absolute (95% CI) |
| | **VAS at end of treatment** | | --- | | | | | | | | | | | | | |
| 2 | RCT | Serious a | Not serious | Not serious | Serious b | None | 50 | | 50 | | MD 13.97 lower (18.10 lower to 9.84 lower) | ⨁⨁◯◯ Low a, b |
| **VAS at 1 menstrual cycle PT** | | | | | | | | | | | | |
| 1 | RCT | Serious a | Not serious | Not serious | Serious b | None | 30 | | 30 | | MD 21.70 lower (26.59 lower to 16.81 lower) | ⨁⨁◯◯ Low a, b |
| **VAS at 2 menstrual cycles PT** | | | | | | | | | | | | |
| 1 | RCT | Serious a | Not serious | Not serious | Serious b | None | 30 | | 30 | | MD 22.00 lower (26.94 lower to 17.06 lower) | ⨁⨁◯◯ Low a, b |
| **VAS at 3 menstrual cycles PT** | | | | | | | | | | | | |
| 2 | RCT | Serious a | Not serious | Not serious | Serious b | None | 50 | | 50 | | MD 19.95 lower (24.23 lower to 15.66 lower) | ⨁⨁◯◯ Low a, b |
| **CMSS at end of treatment** | | | | | | | | | | | | |
| 1 | RCT | Serious a | Not serious | Not serious | Serious b | None | 30 | | 30 | | MD 10.23 lower (12.93 lower to 7.53 lower) | ⨁⨁◯◯ Low a, b |
| **CMSS at 1 menstrual cycle PT** | | | | | | | | | | | | |
| 1 | RCT | Serious a | Not serious | Not serious | Serious b | None | 30 | | 30 | | MD 9.49 lower (12.18 lower to 6.80 lower) | ⨁⨁◯◯ Low a, b |
| **CMSS at 2 menstrual cycles PT** | | | | | | | | | | | | |
| 1 | RCT | Serious a | Not serious | Not serious | Serious b | None | 30 | | 30 | | MD 8.96 lower (11.69 lower to 6.23 lower) | ⨁⨁◯◯ Low a, b |
| **CMSS at 3 menstrual cycles PT** | | | | | | | | | | | | |
| 1 | RCT | Serious a | Not serious | Not serious | Serious b | None | 30 | | 30 | | MD 2.37 lower (5.11 lower to 0.37 lower) | ⨁⨁◯◯ Low a, b |

RCT: randomized trial; CI: Confidence interval; MD: Mean difference; a: Downgrade by 1 level for high risk and some concerns in some studies; b: Downgraded by 1 level for small sample size
